# Supplementary material
Source: MDPI journal article supplement (https://www.mdpi.com/2072-4292/9/1/28)
Supplement: s1 [file s1]

**Supplementary Materials: Assessment of Soil Degradation by Erosion Based on Analysis of Soil Properties Using Aerial Hyperspectral Images and Ancillary Data, Czech Republic. *Remote Sensing* 2017, *9*, 28**

Daniel Žížala, Tereza Zádorová and Jiří Kapička

| 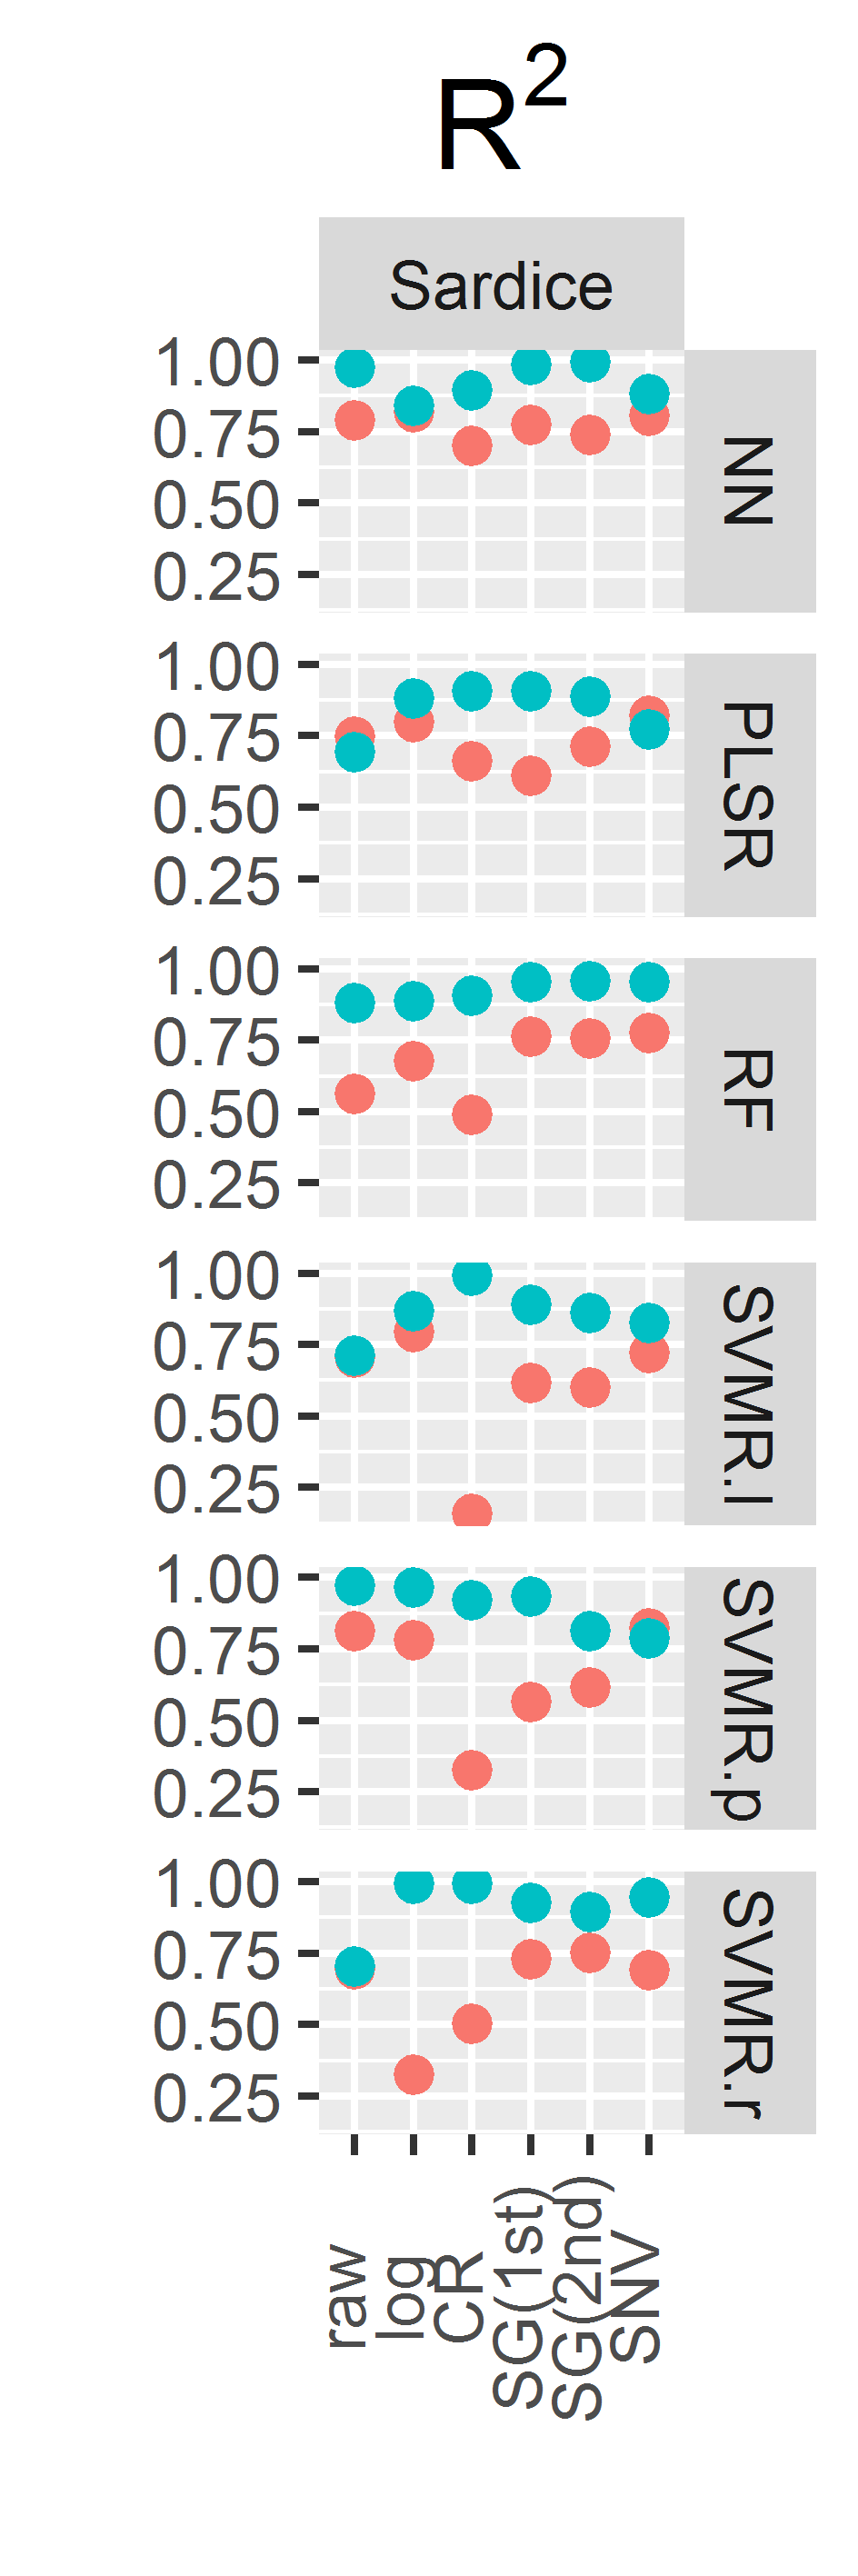  (**a1**) | 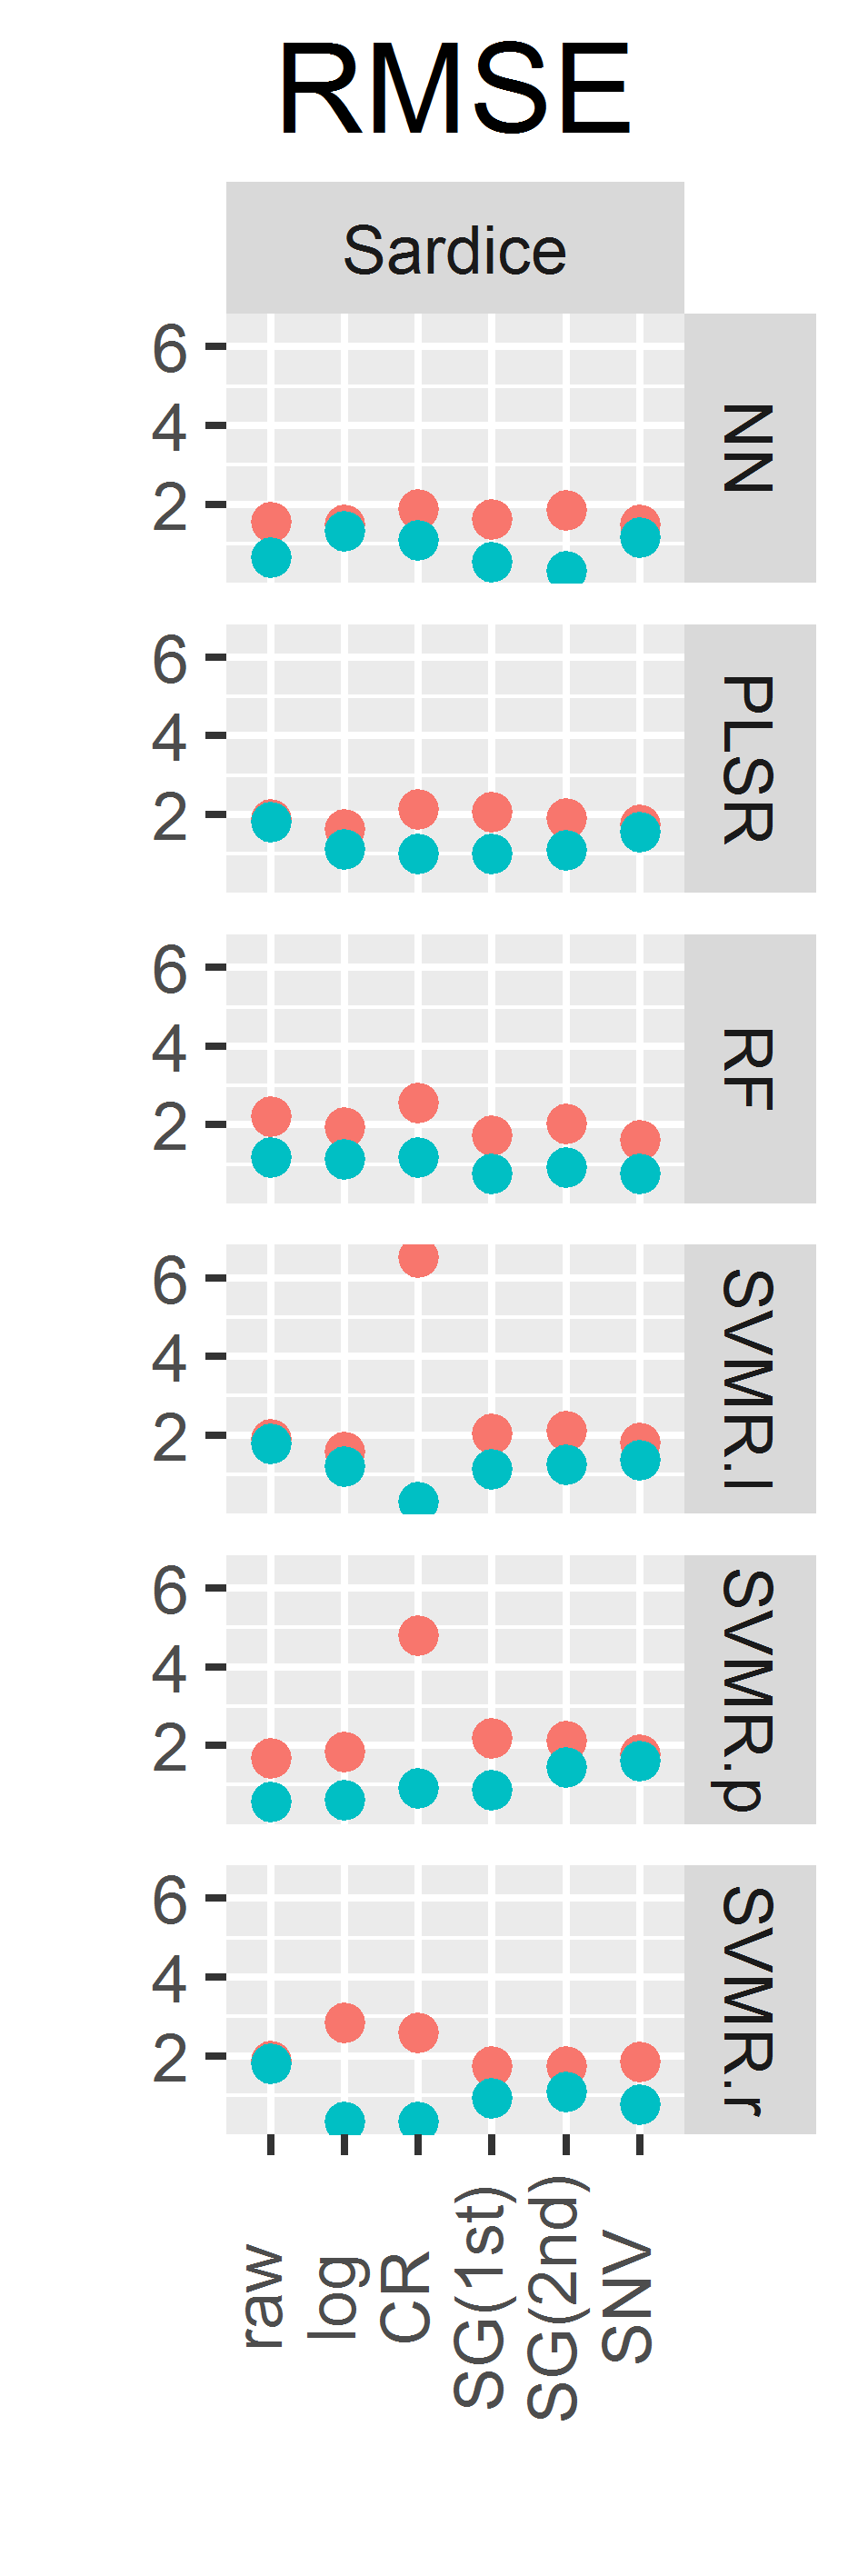  (**a1**) |
| --- | --- |
| 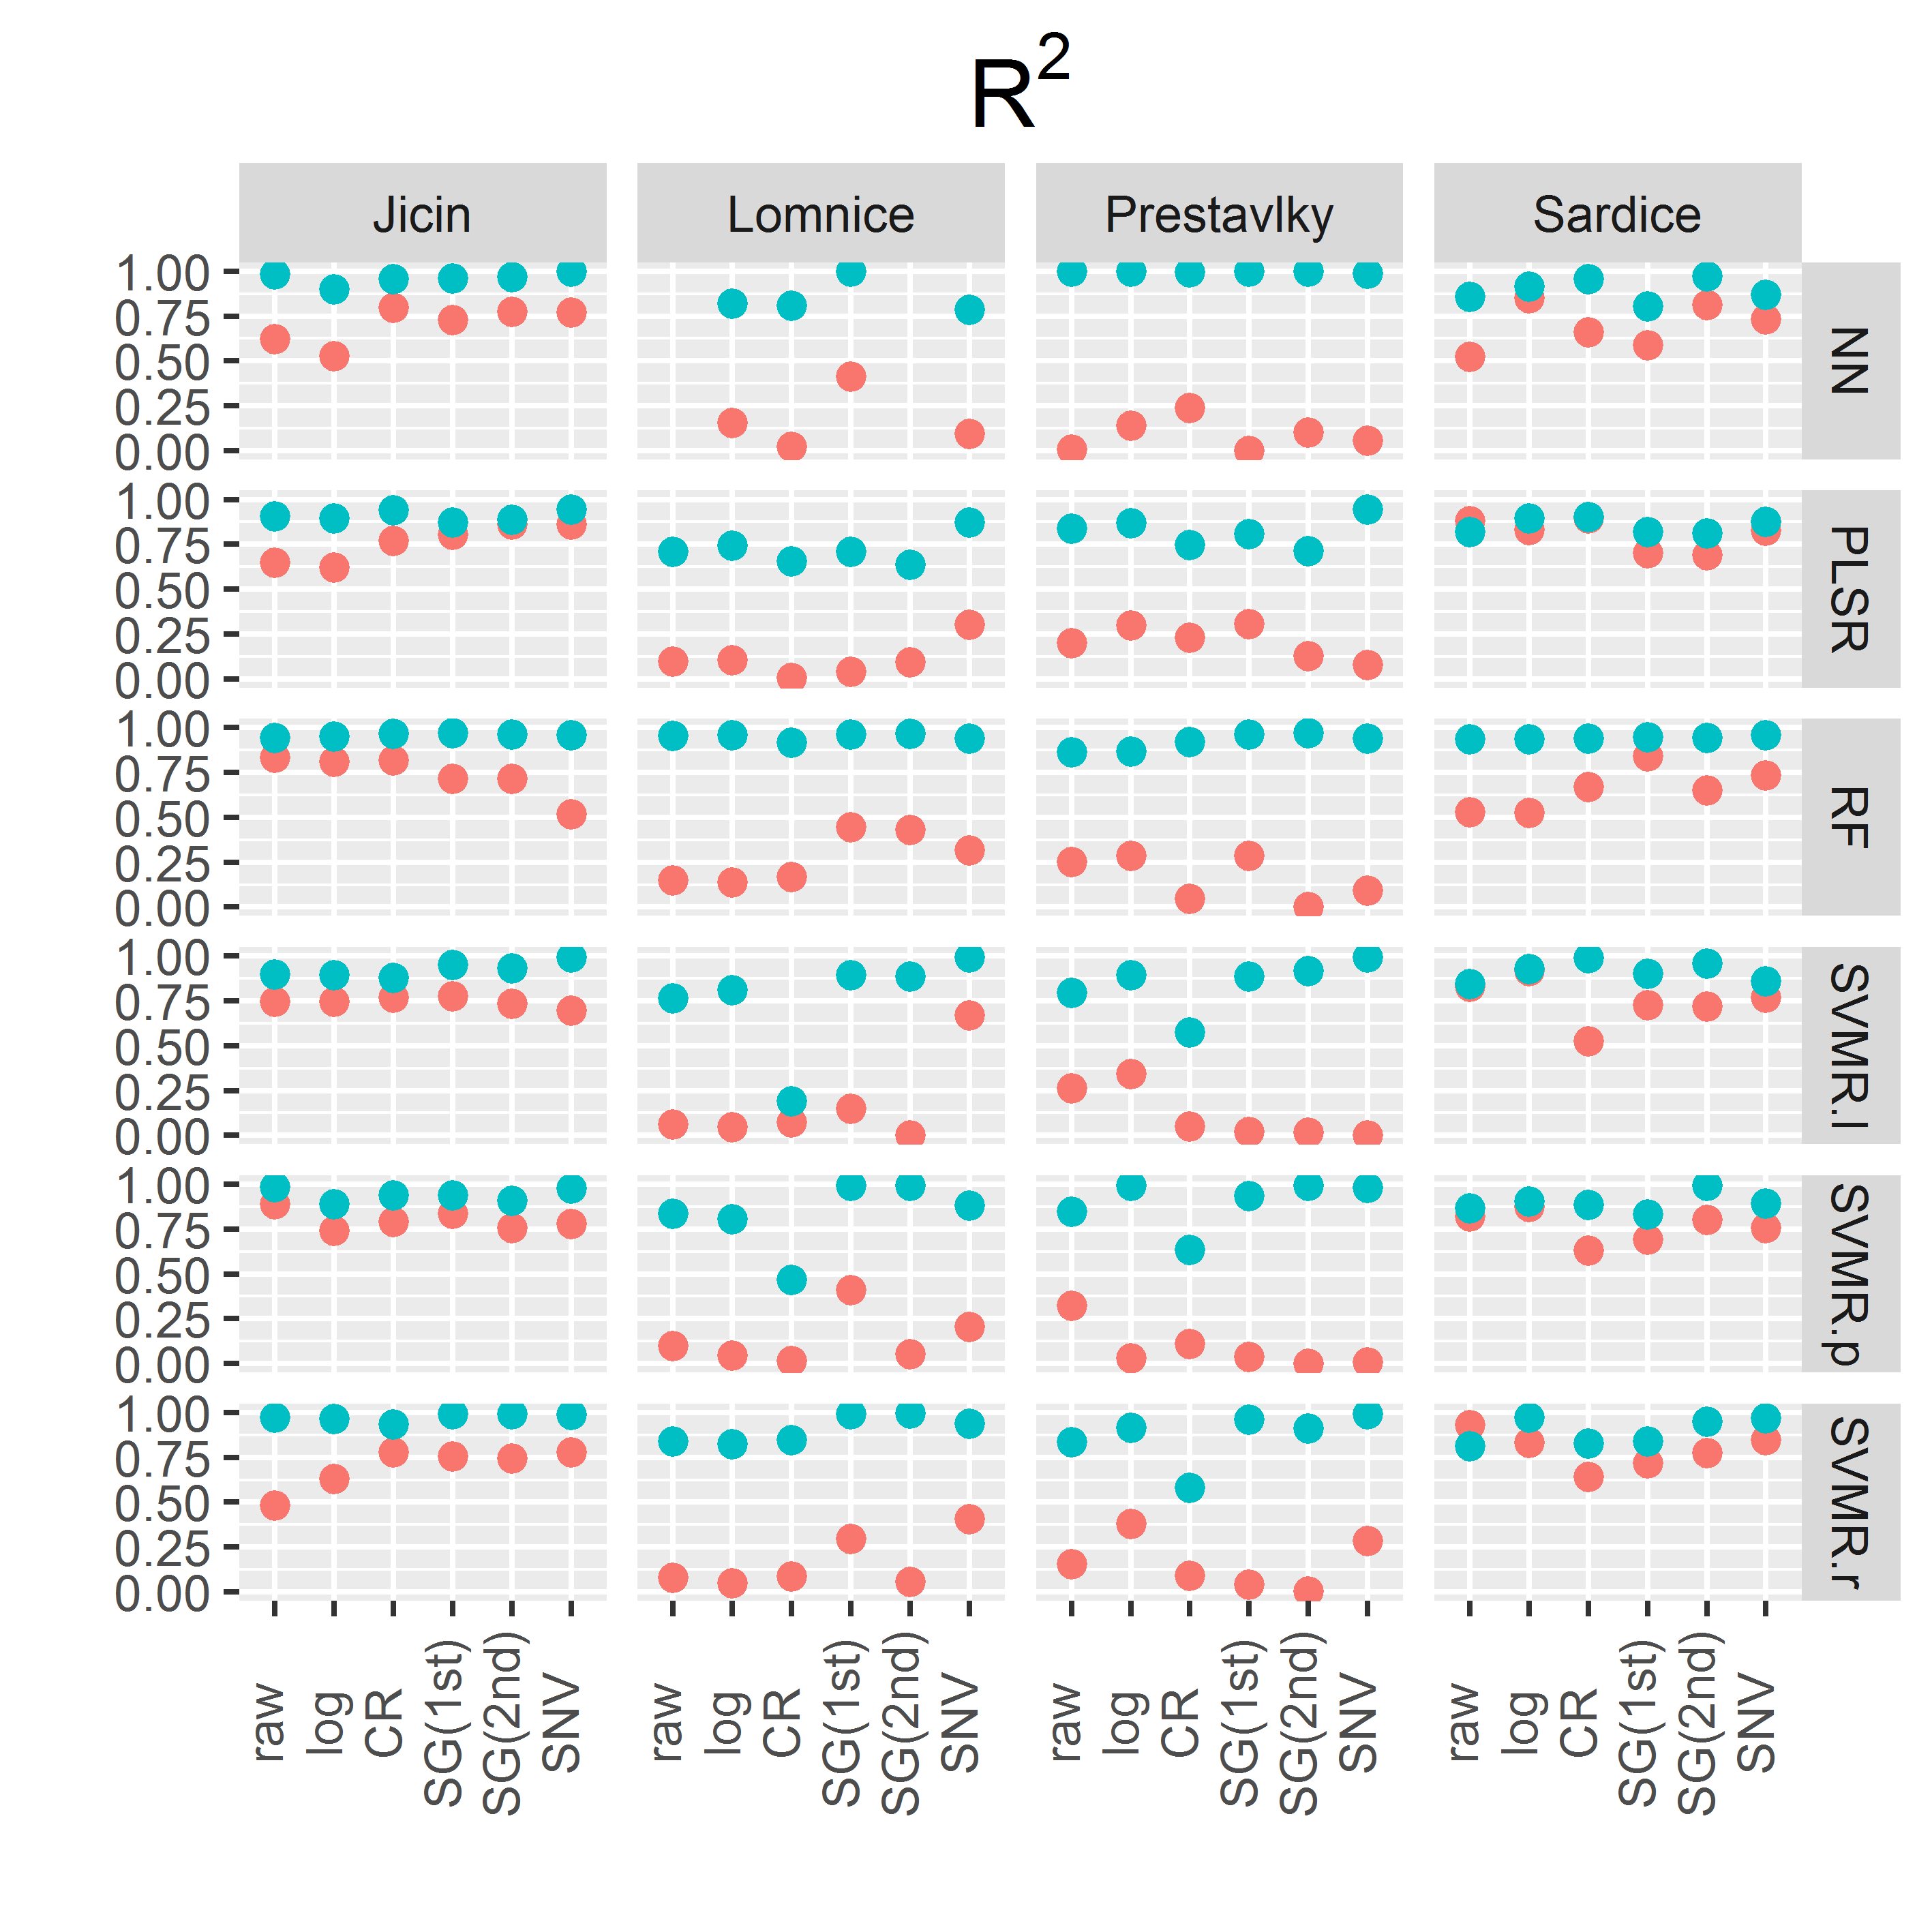 | 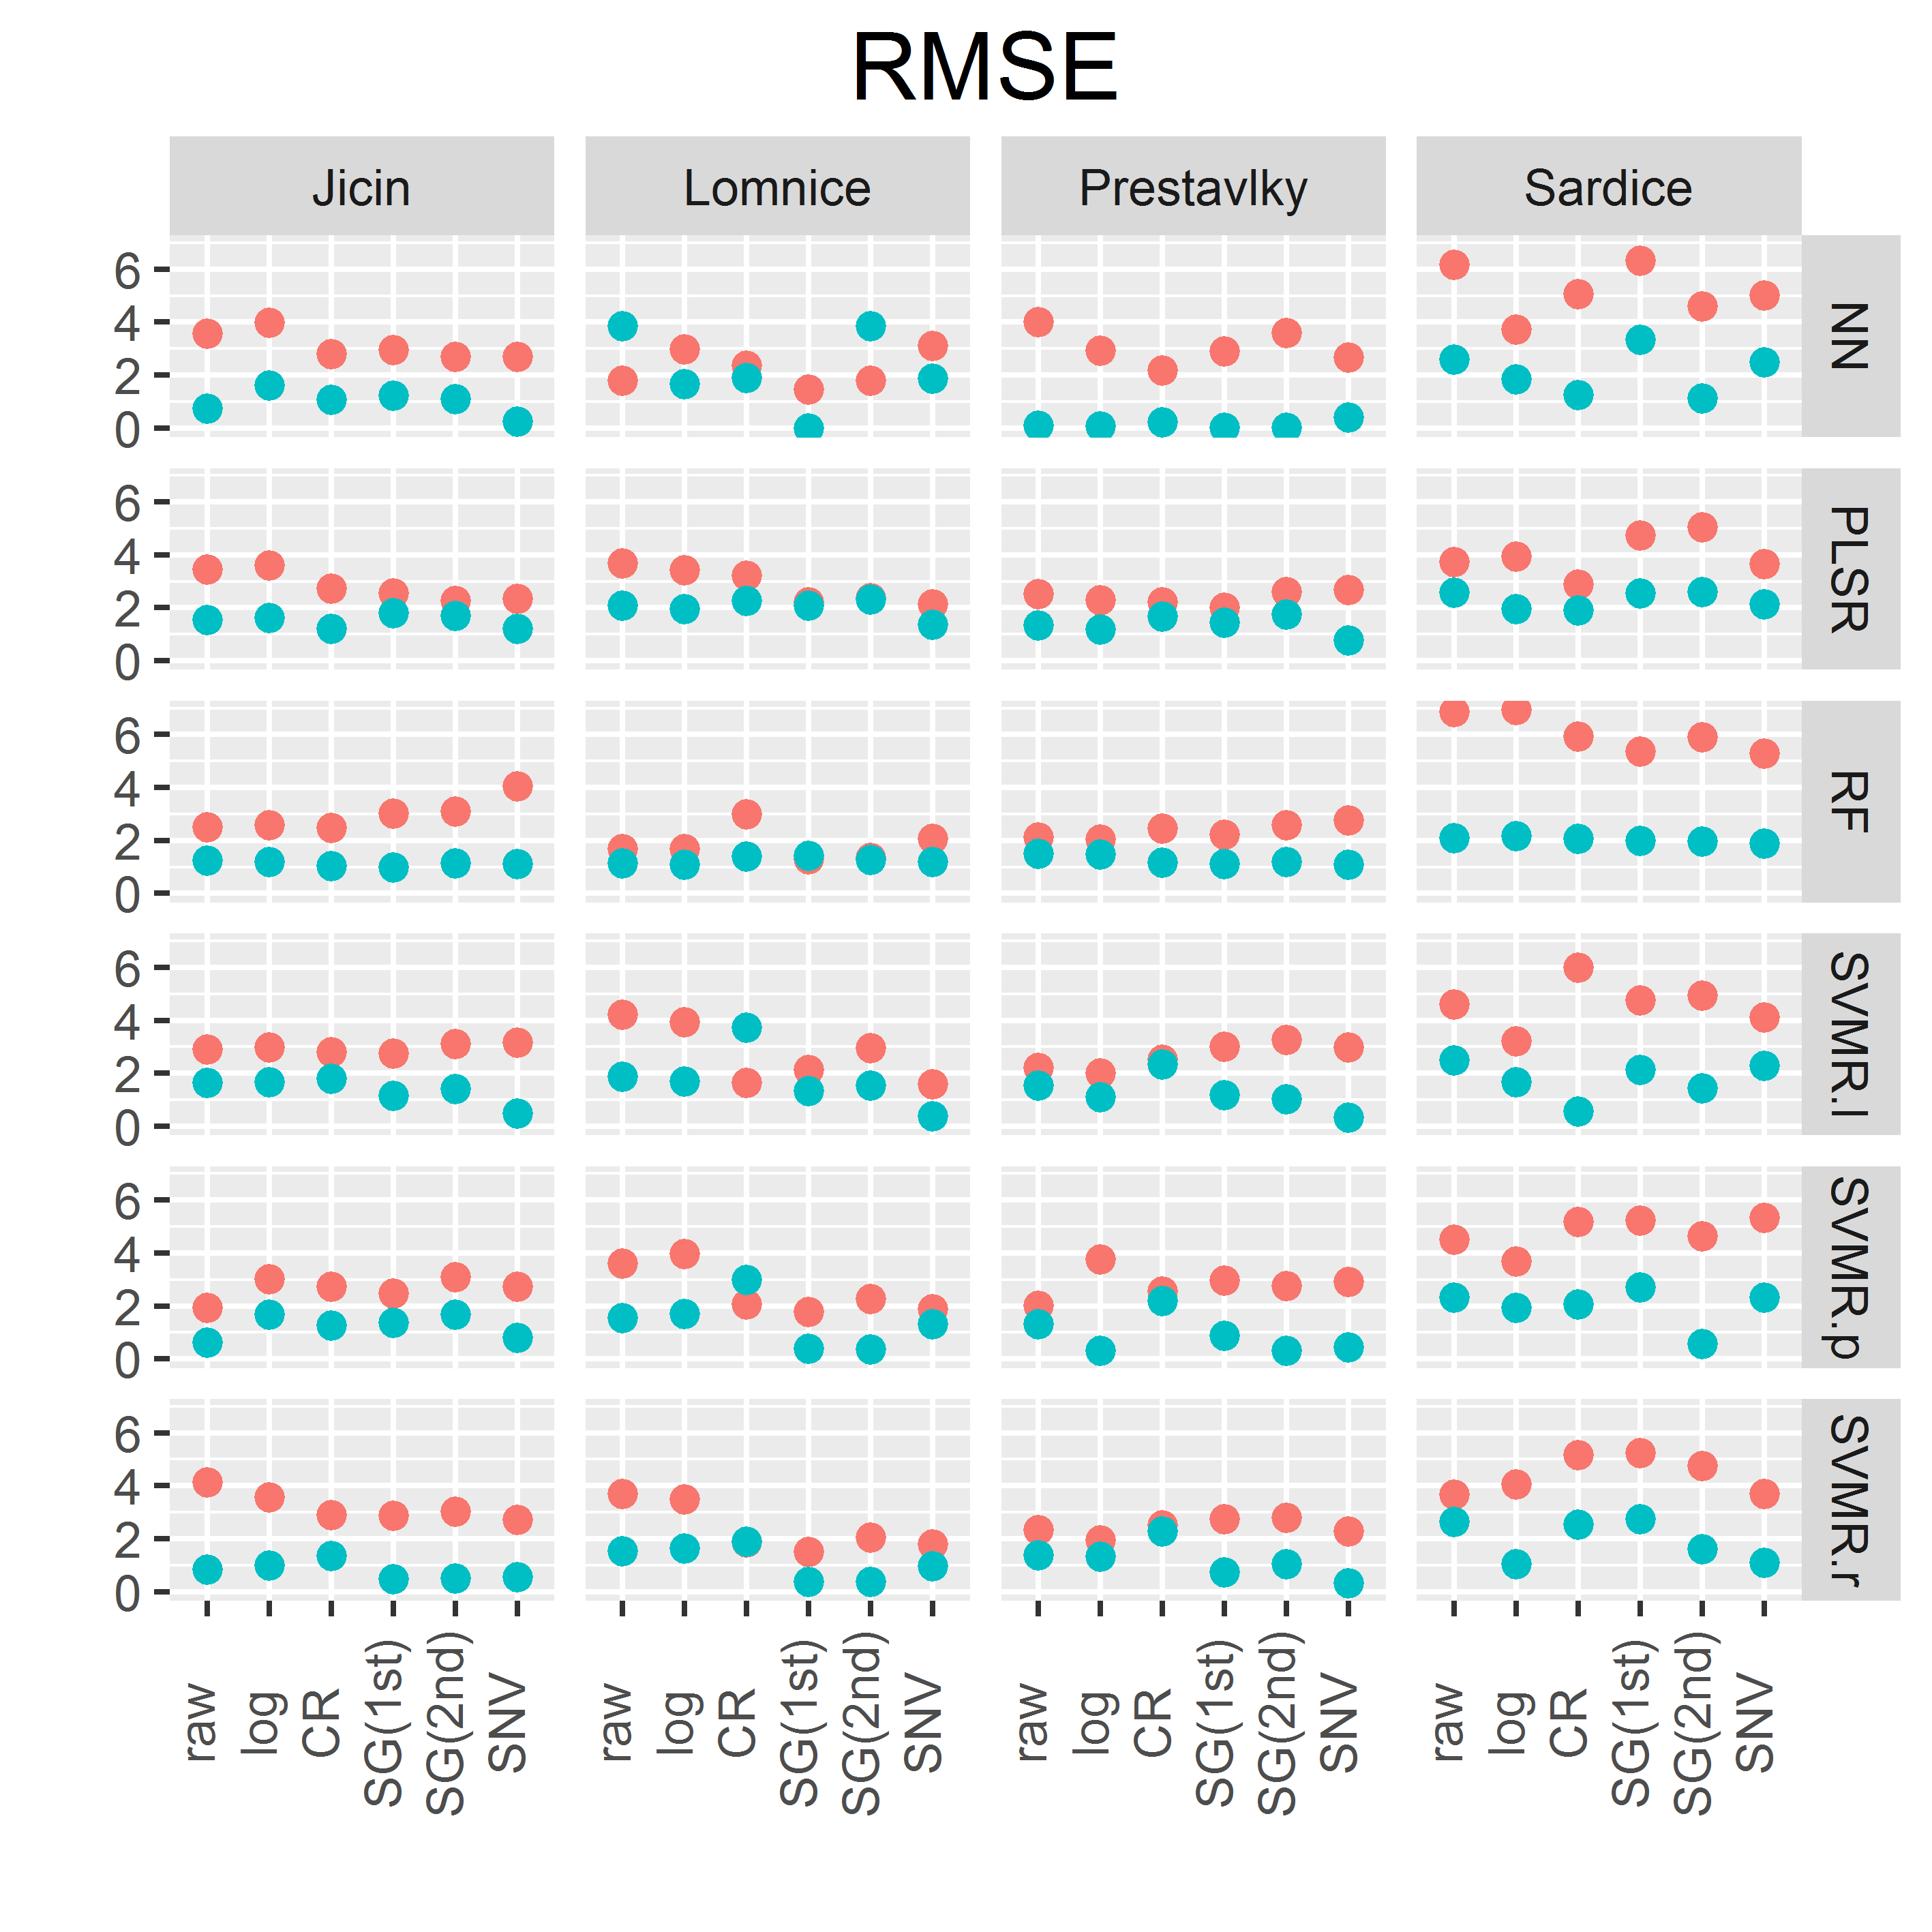 |
| (**b1**) | (**b2**) |
| 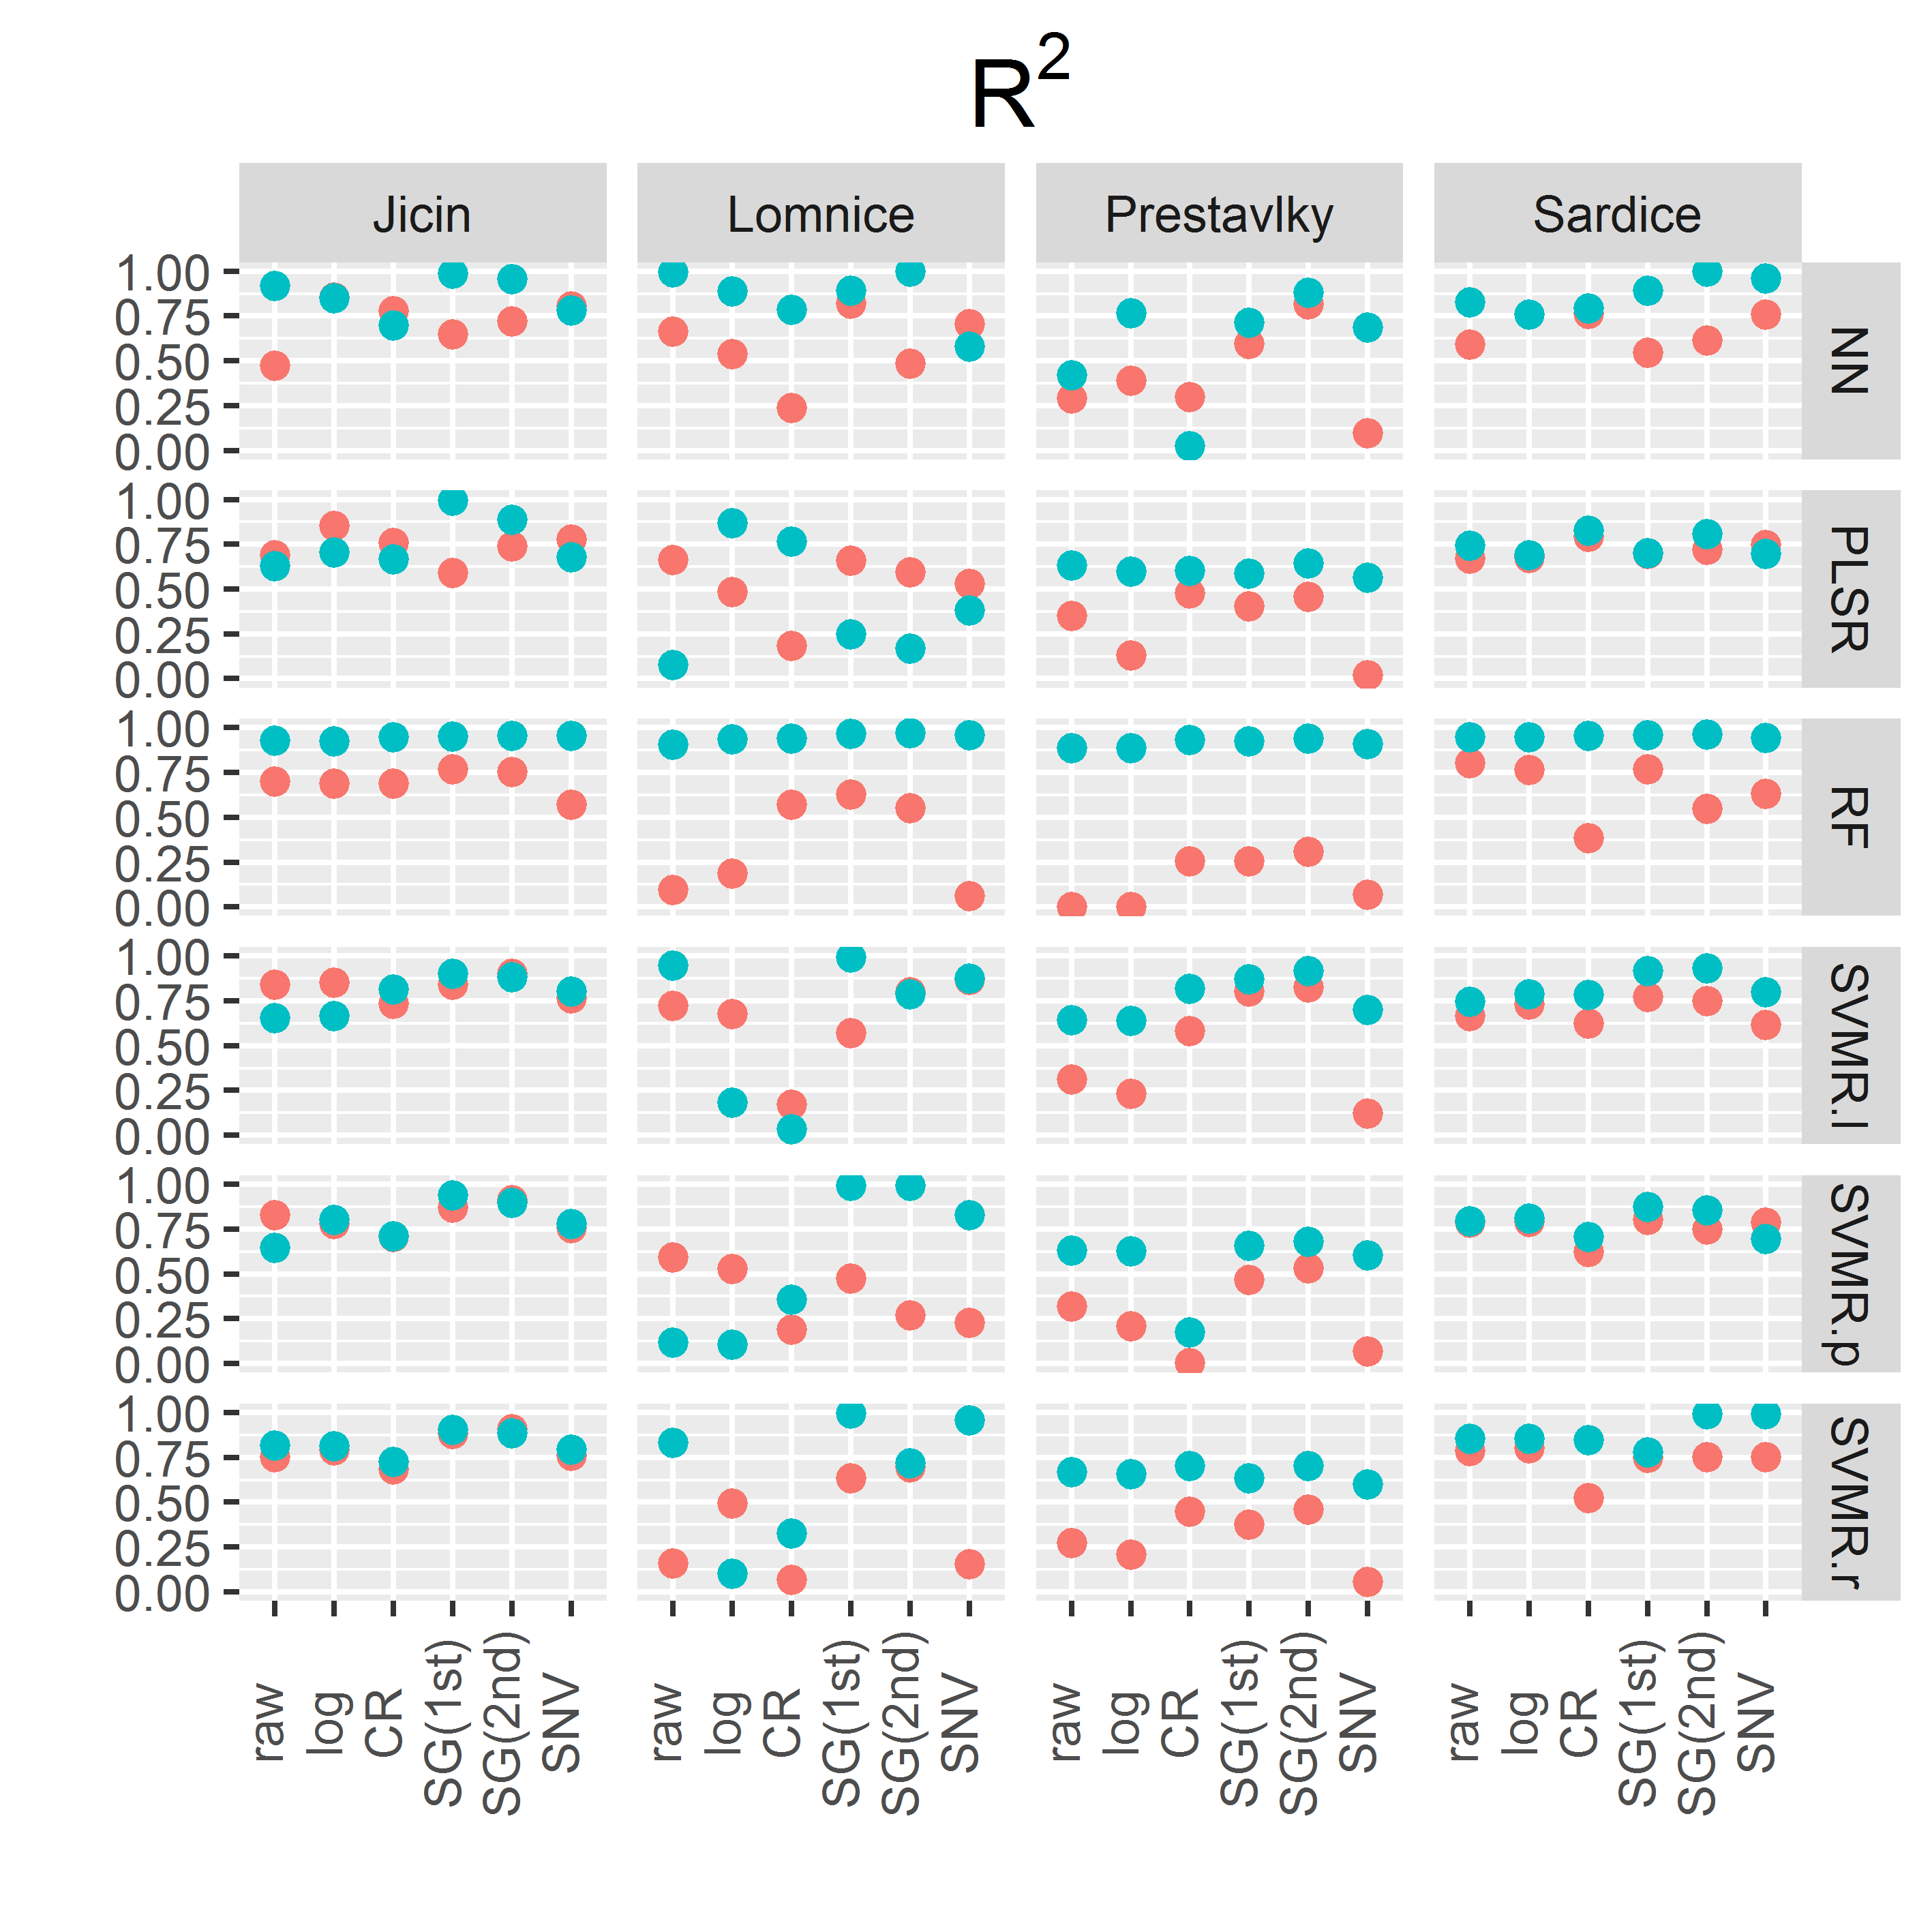 | 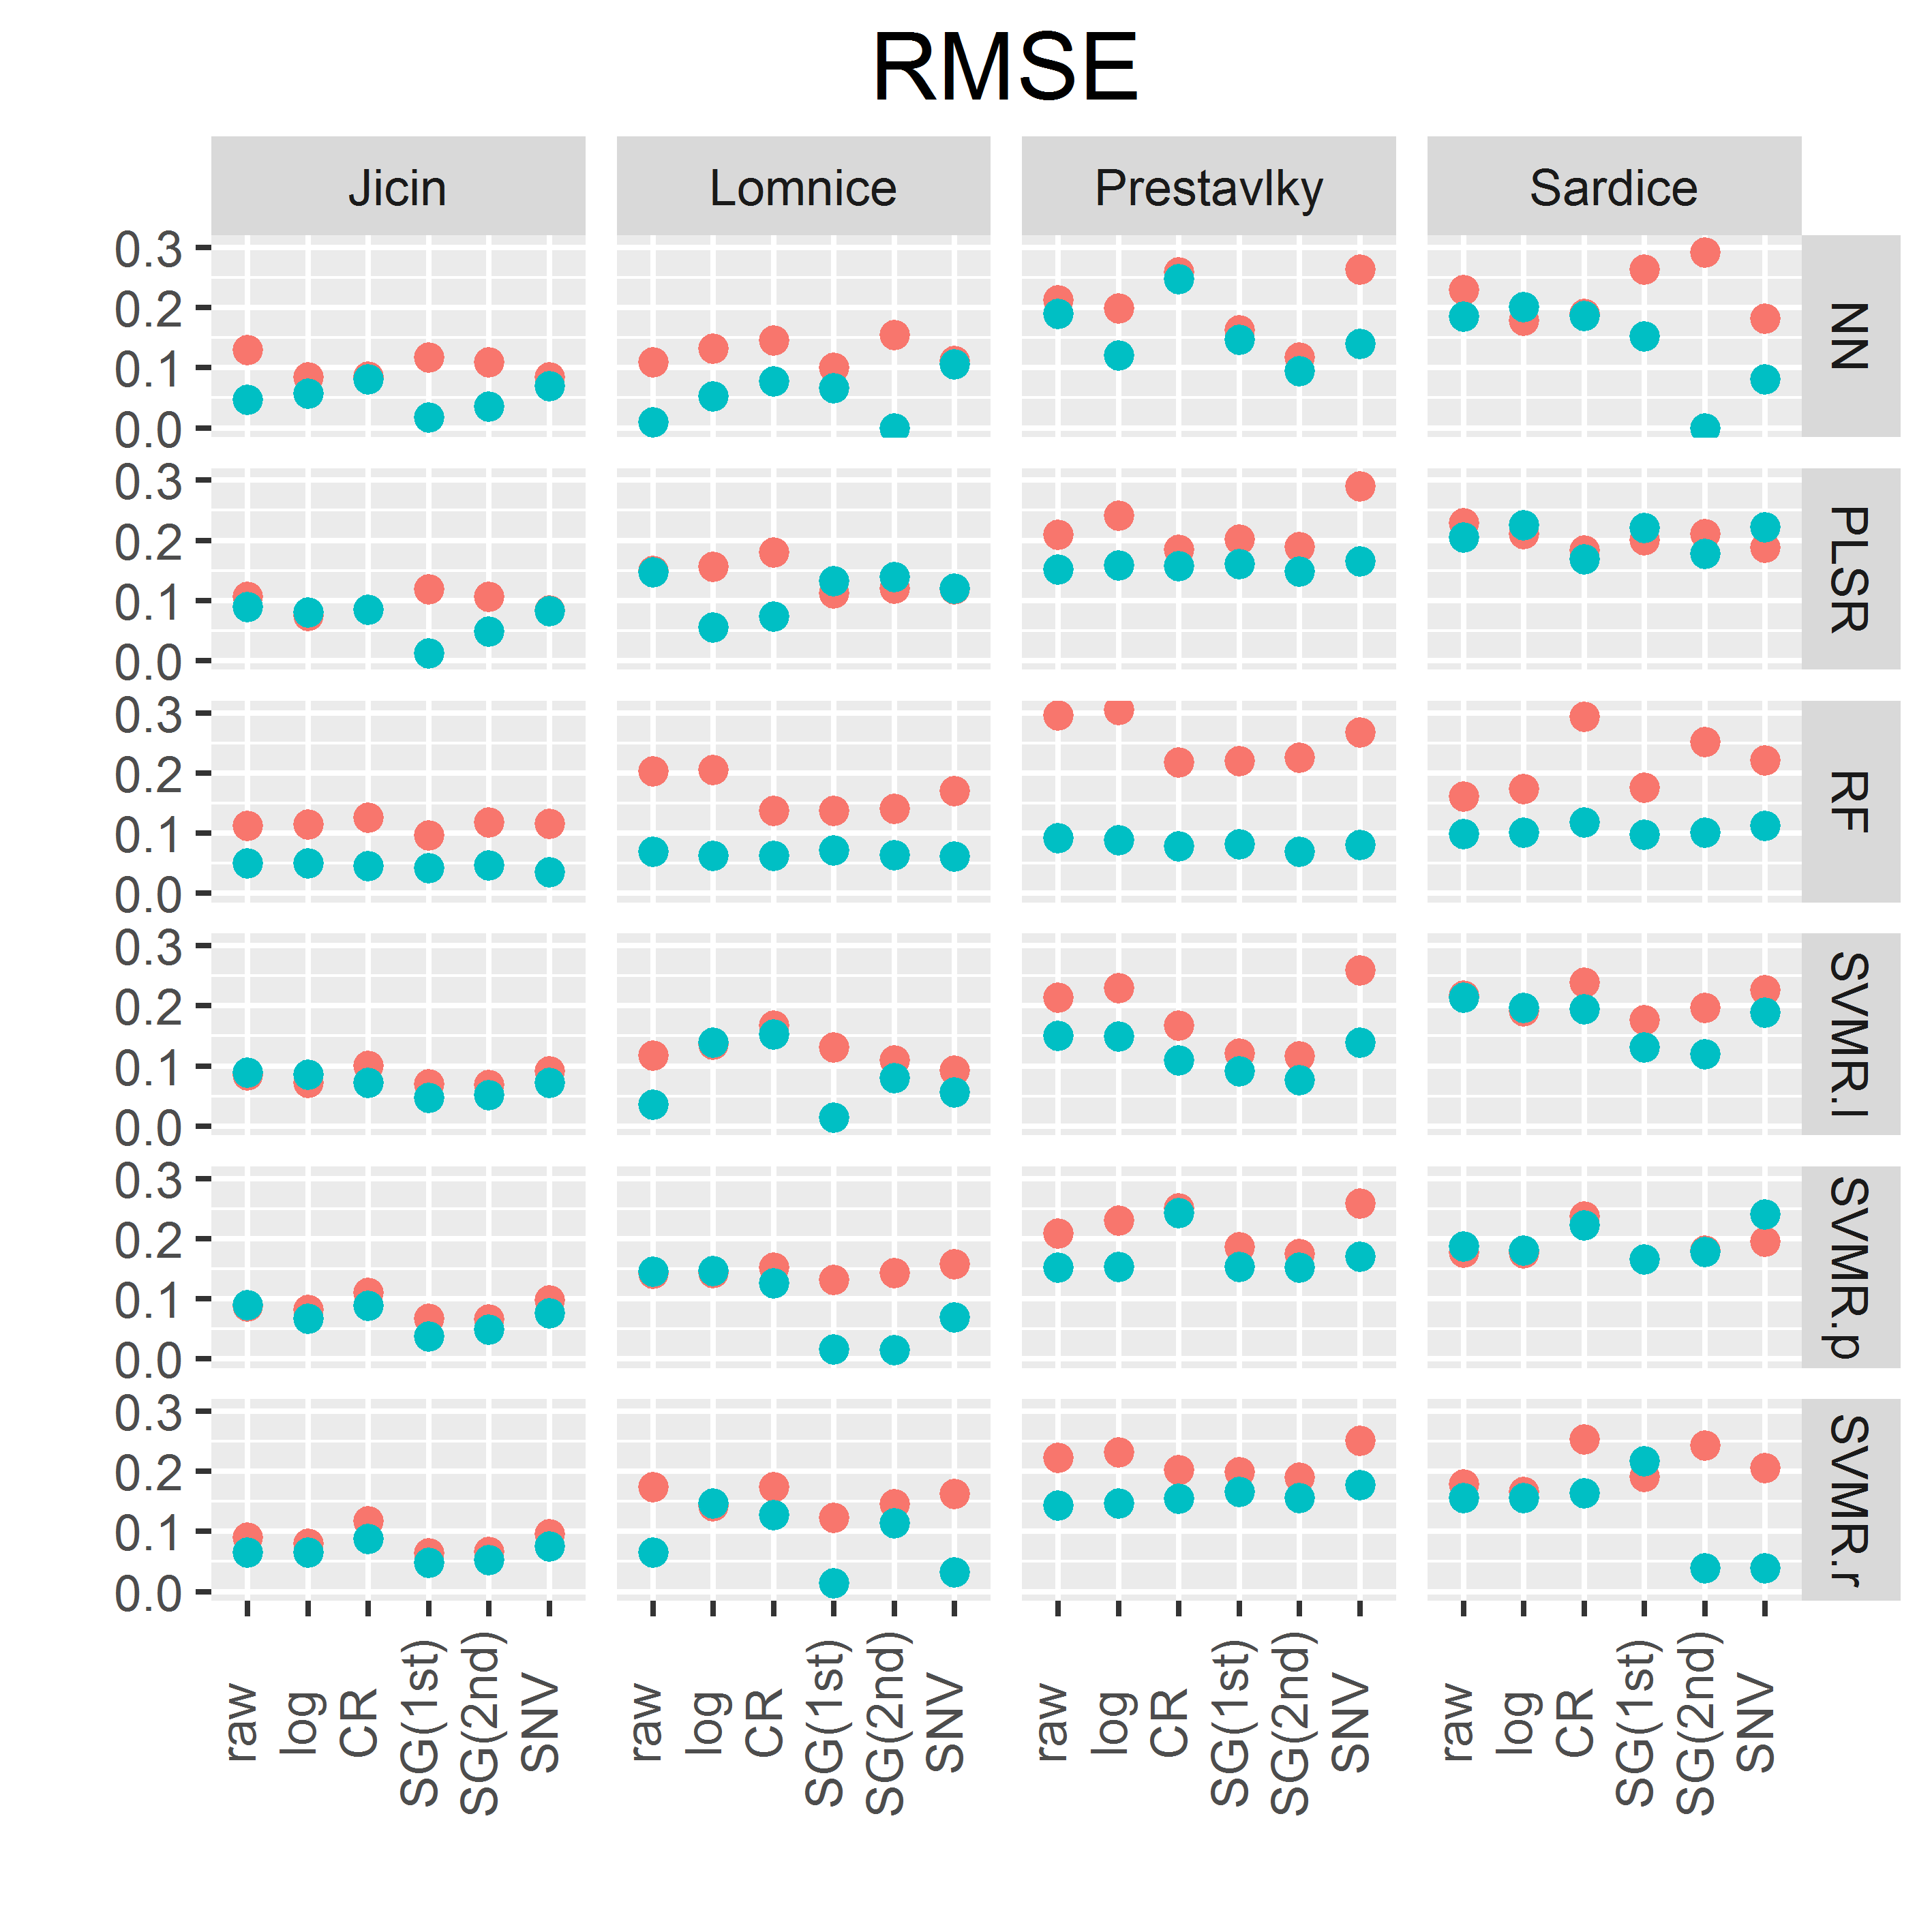 |
| (**c1**) | (**c2**) |
| 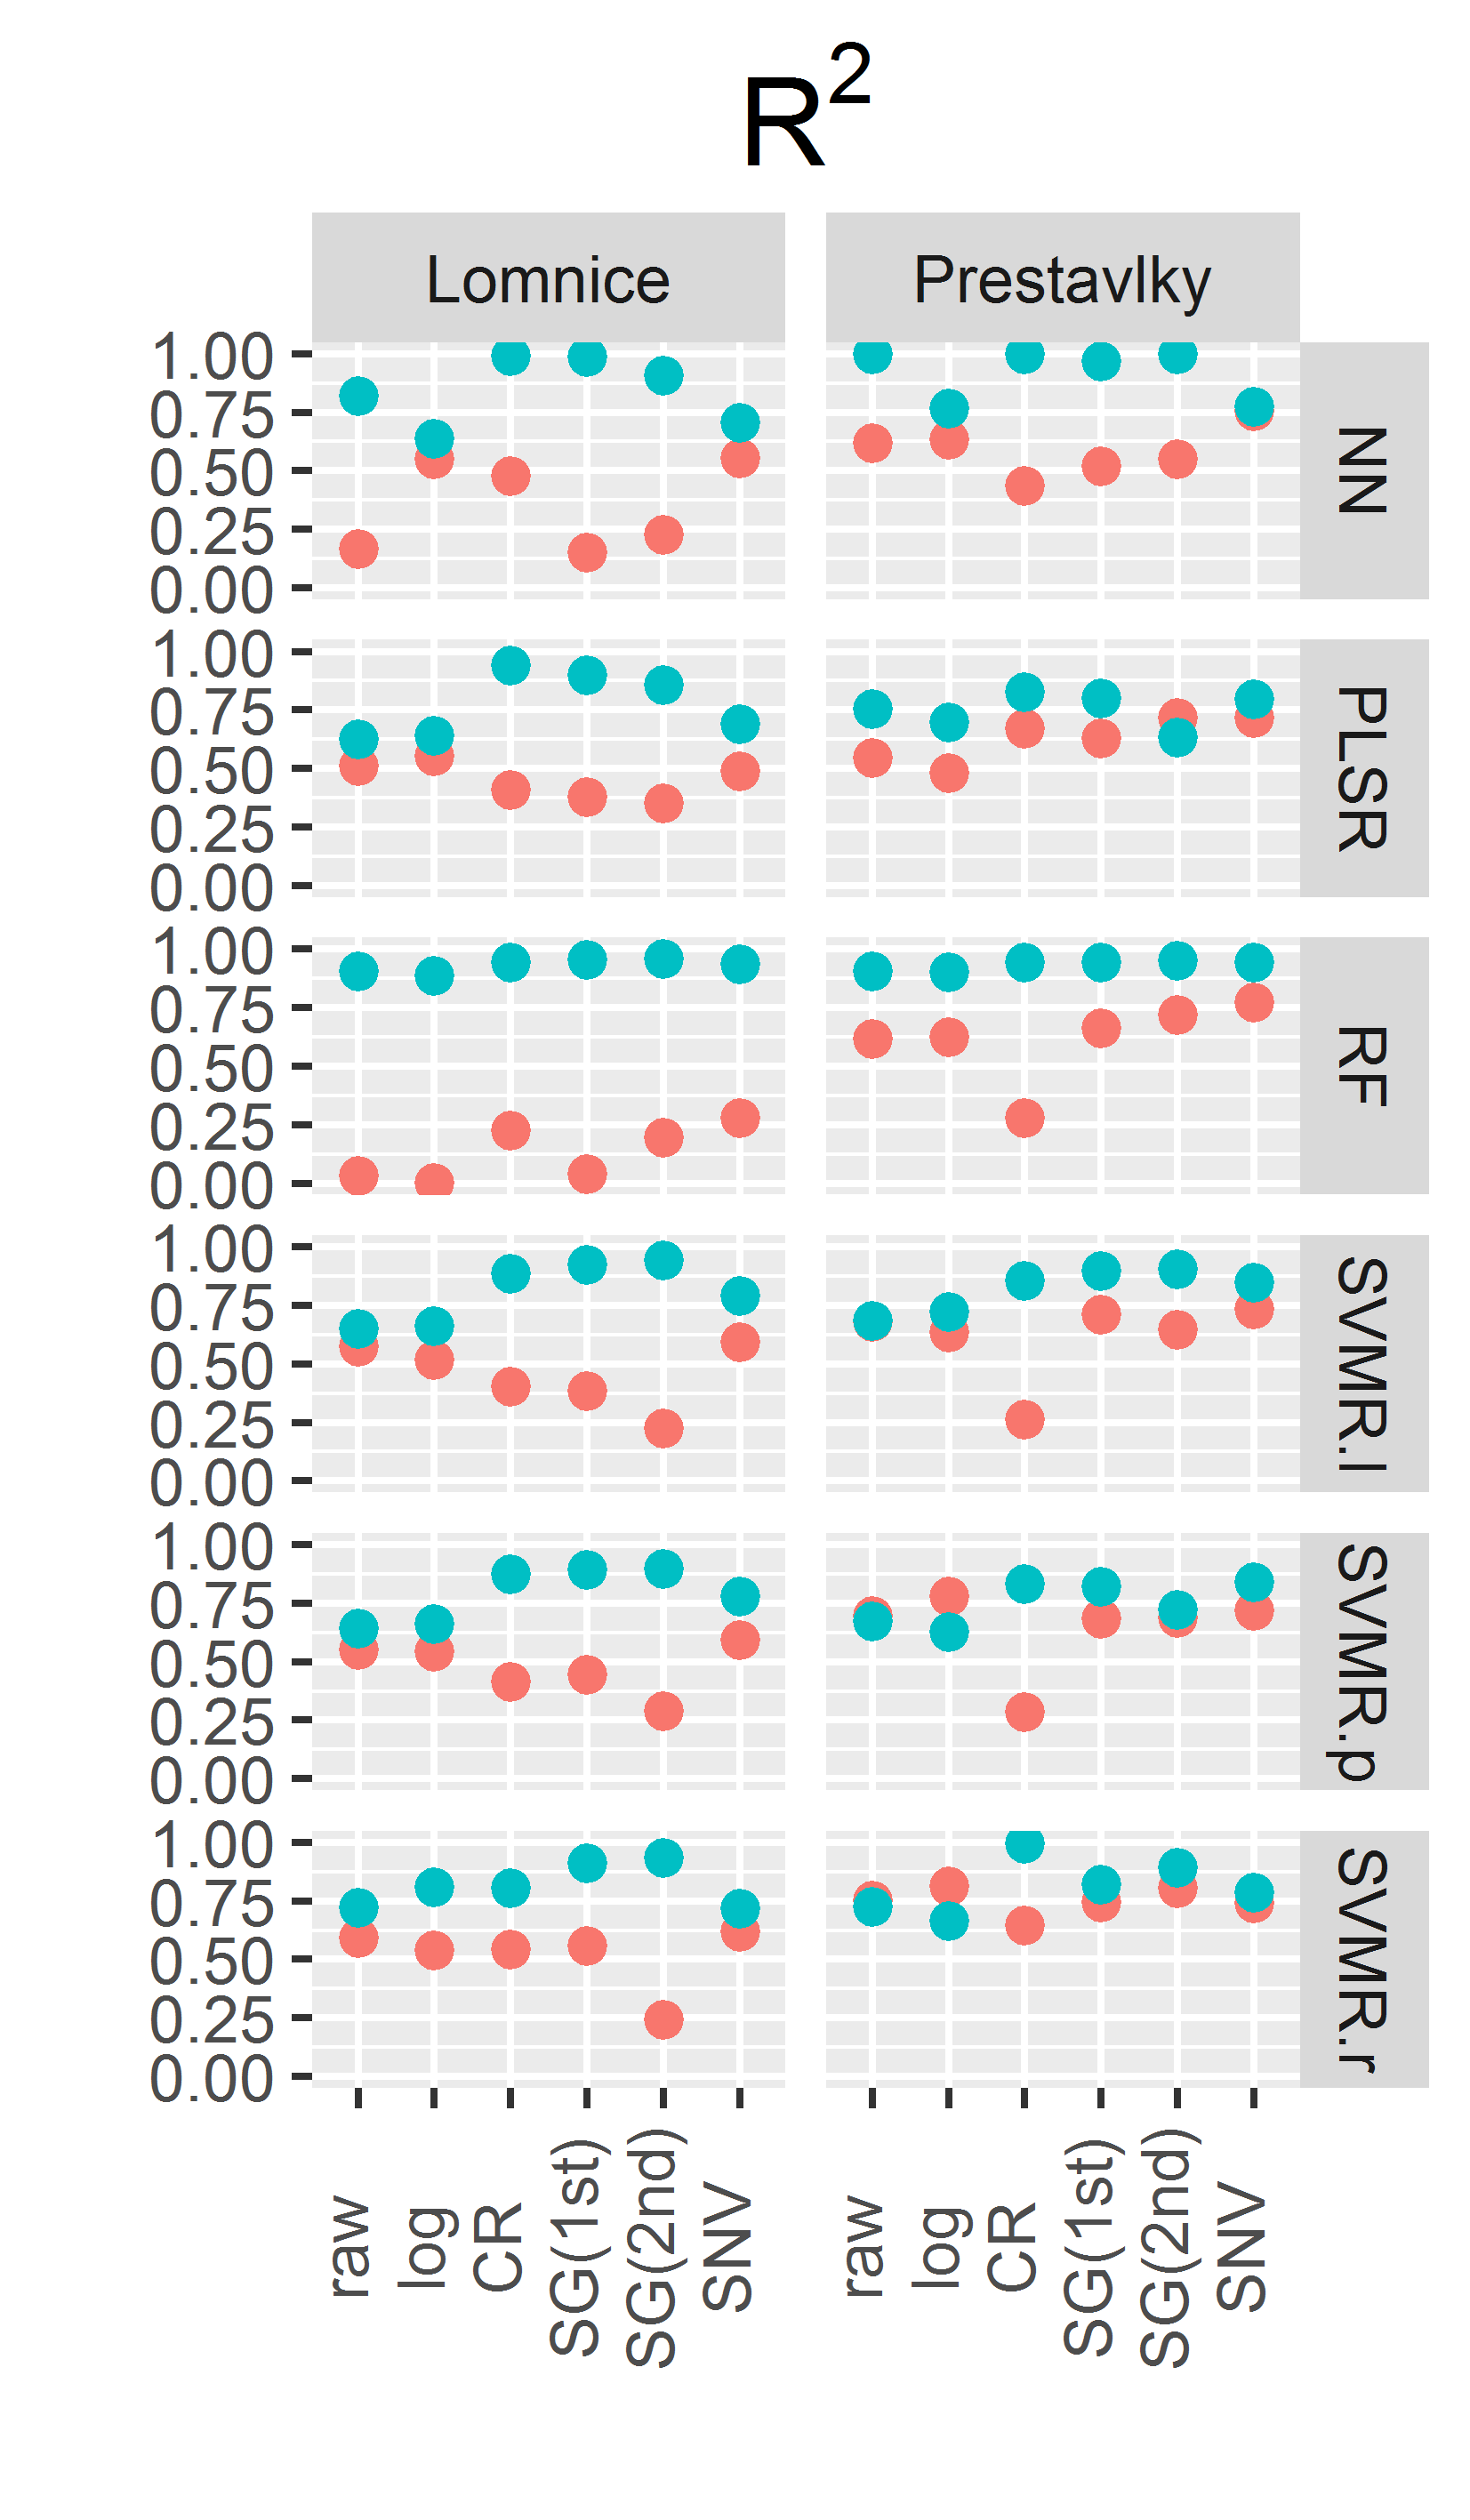 | 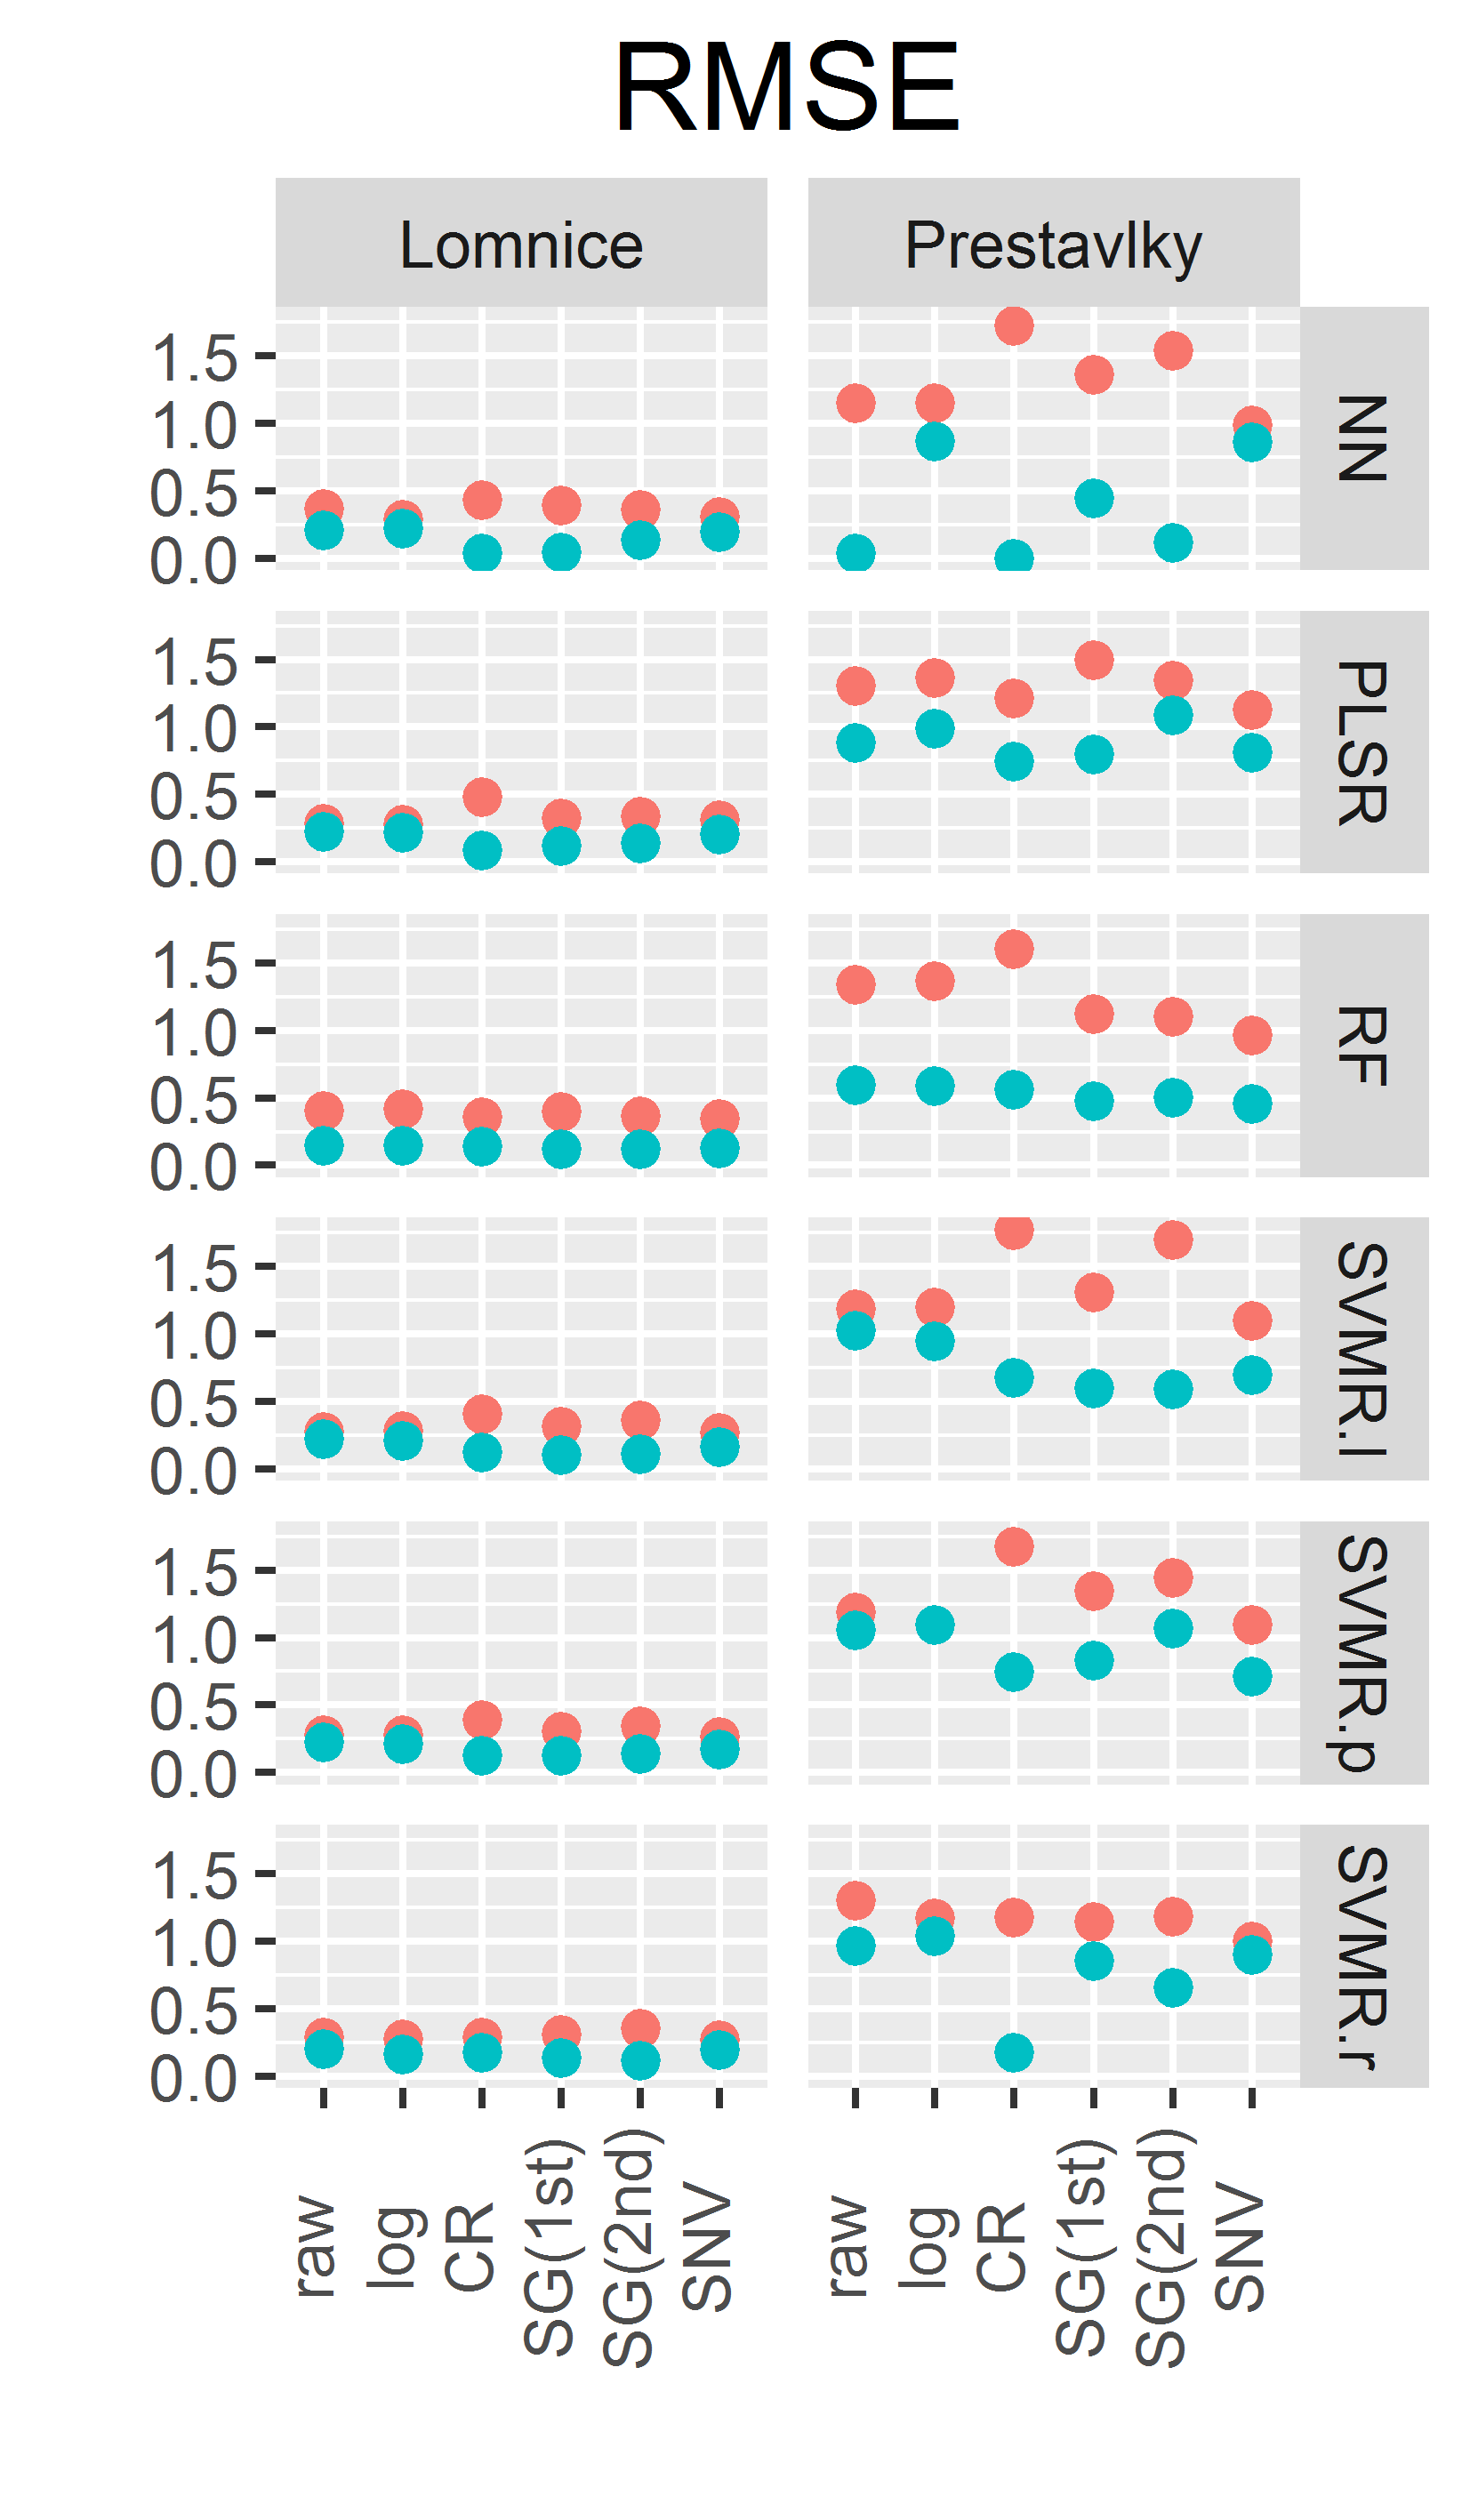 |
| (**d1**) | (**d2**) |
| 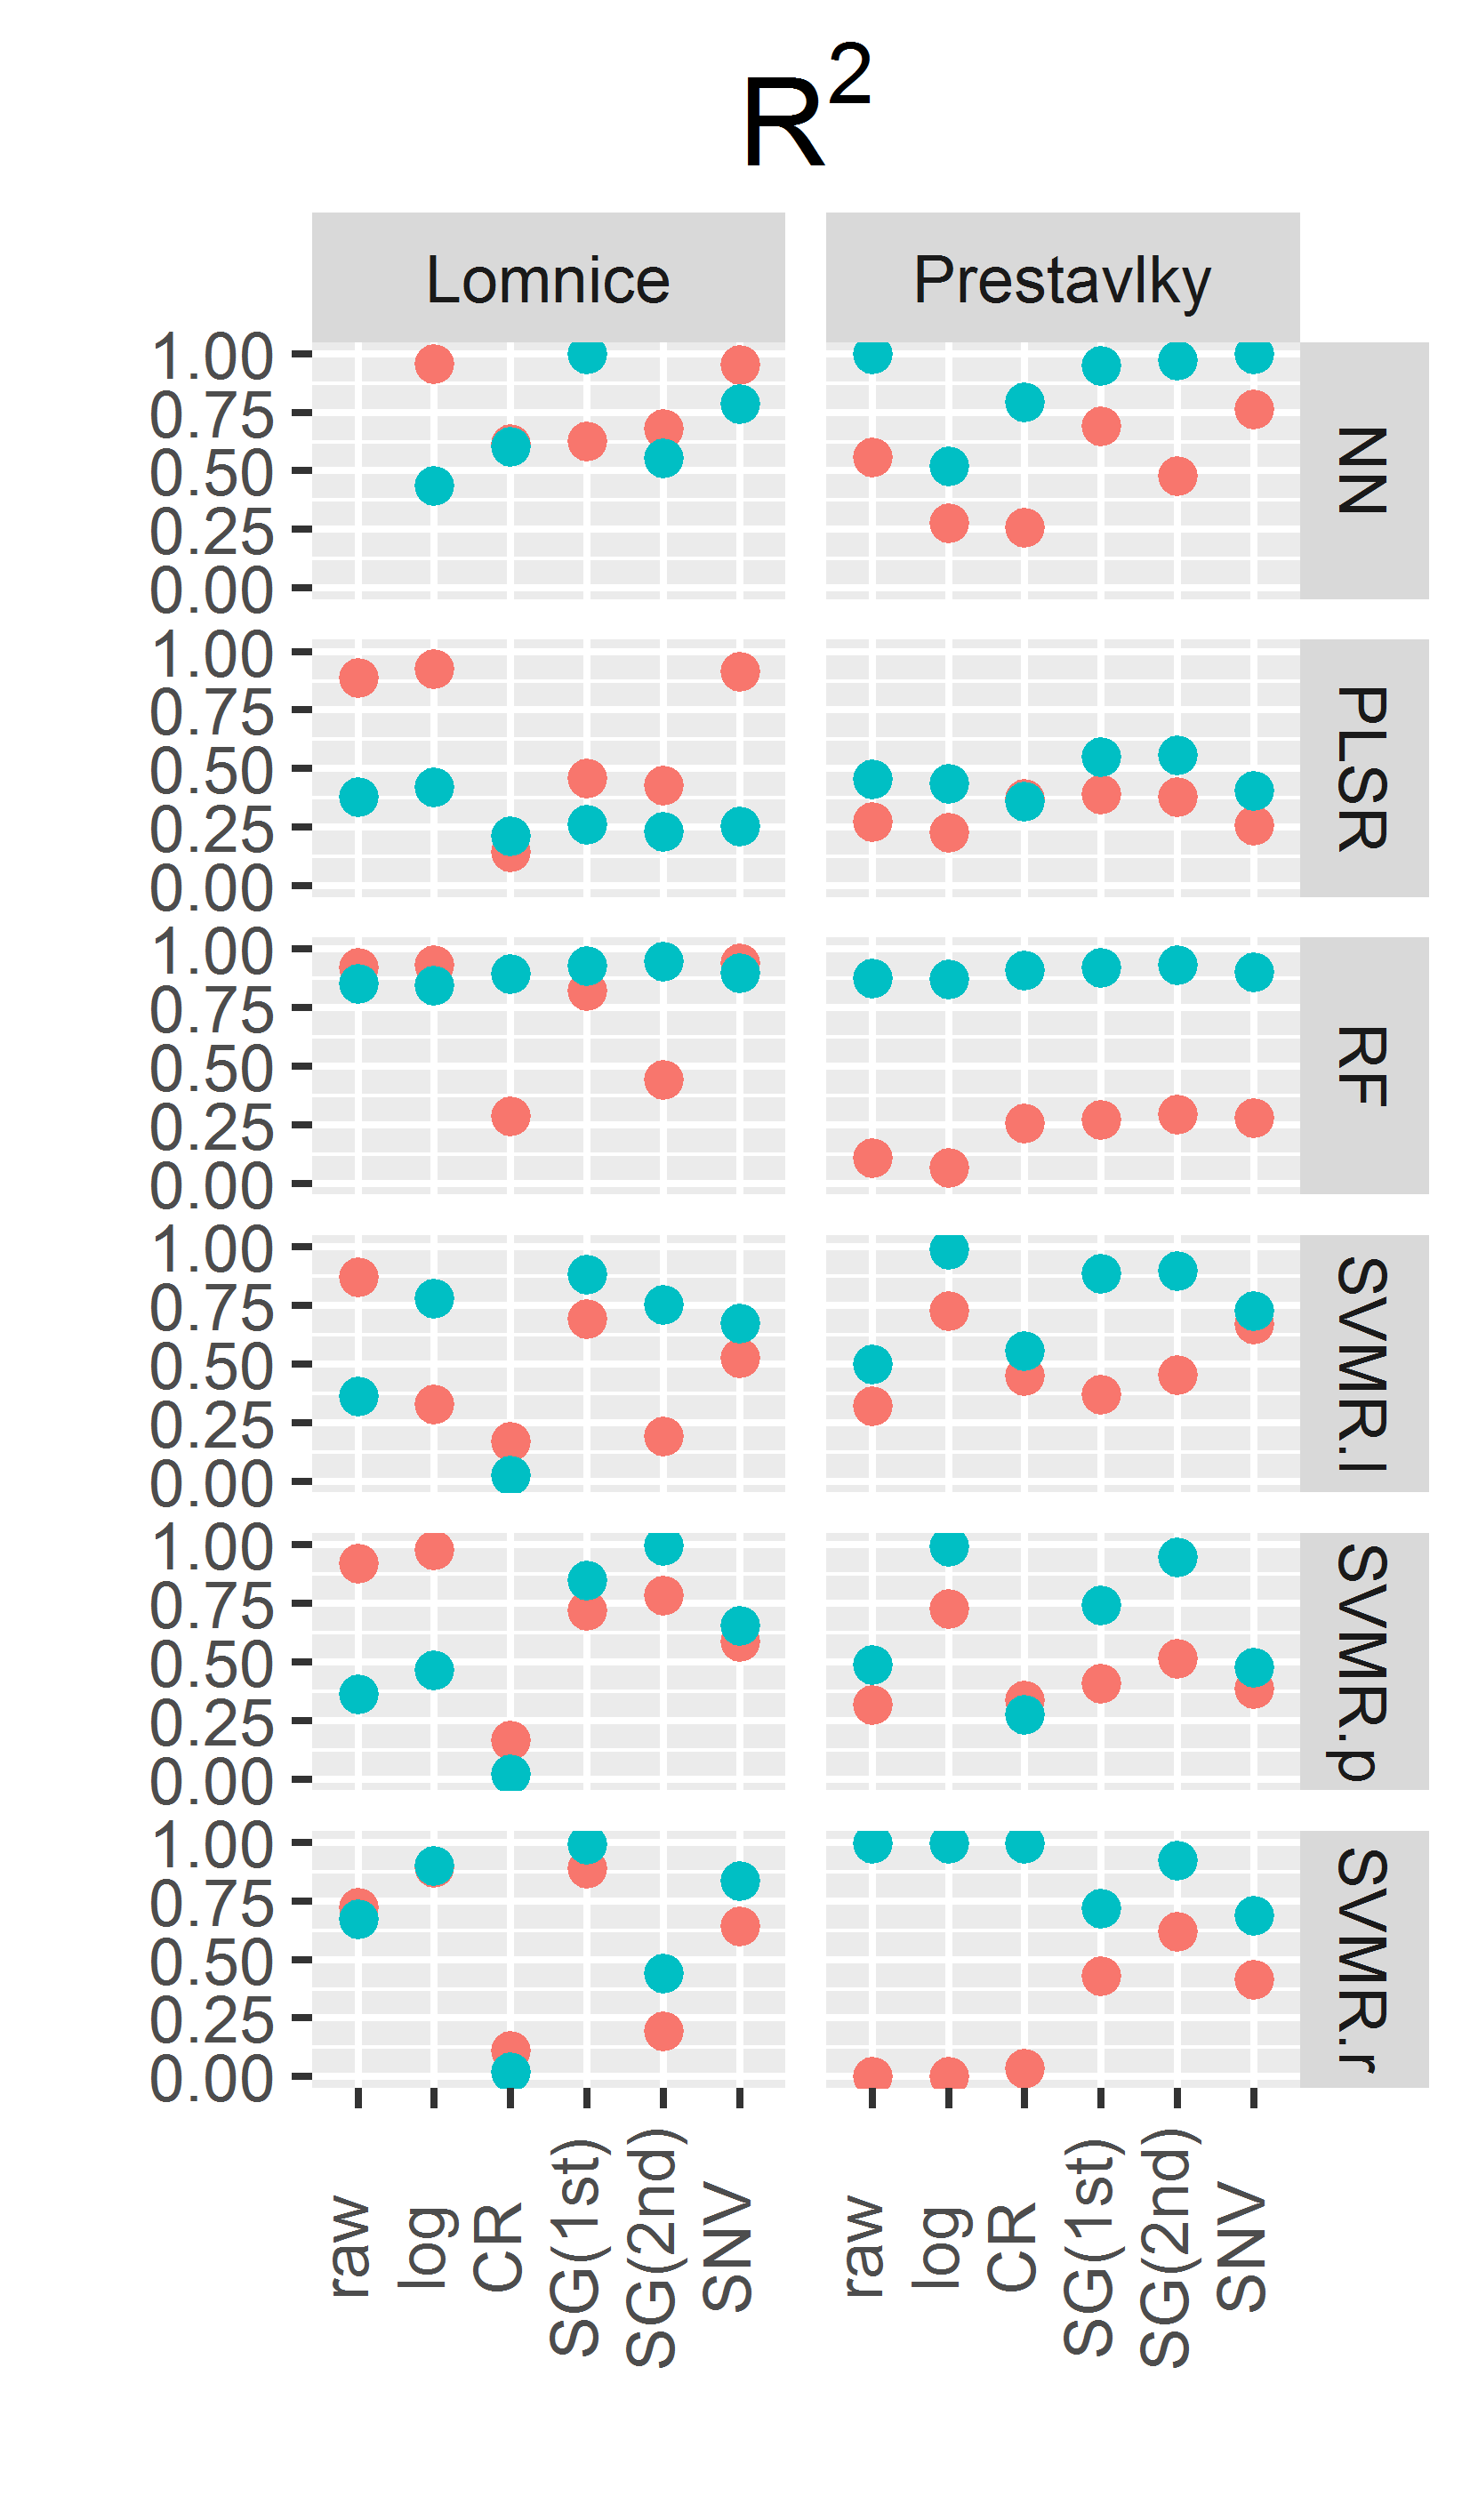 | 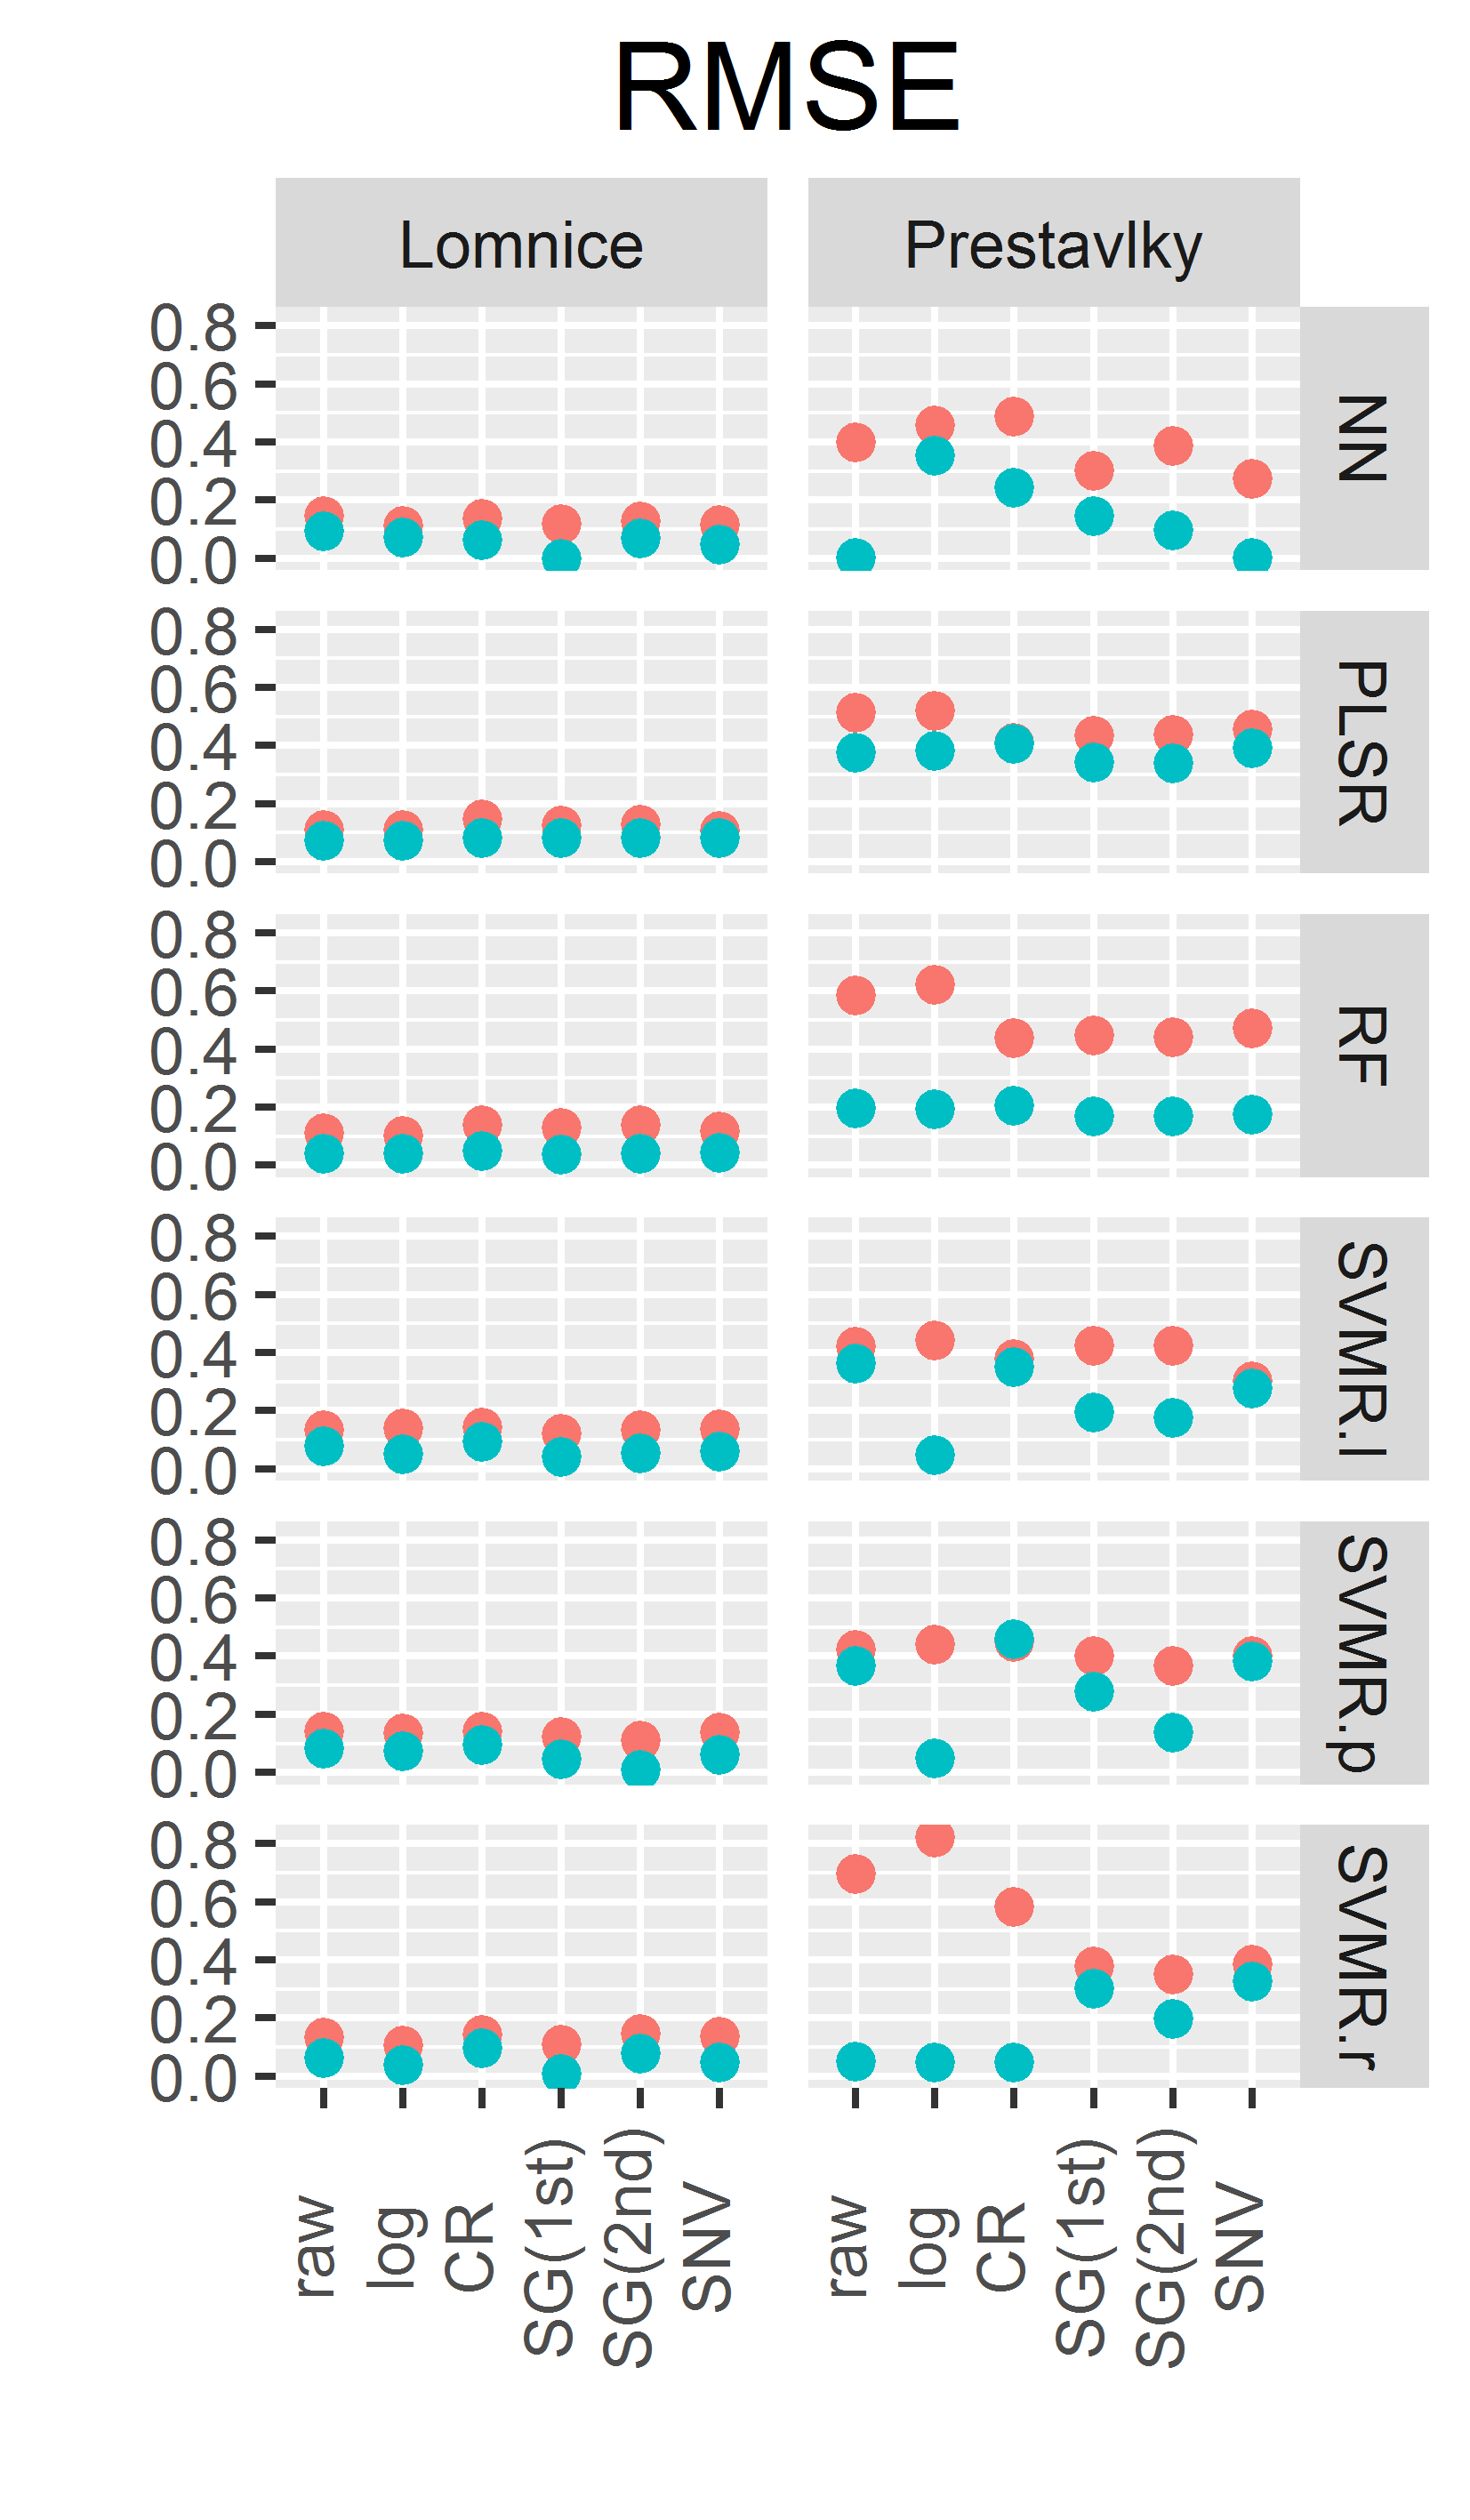 |
| (**e1**) | (**e2**) |
| 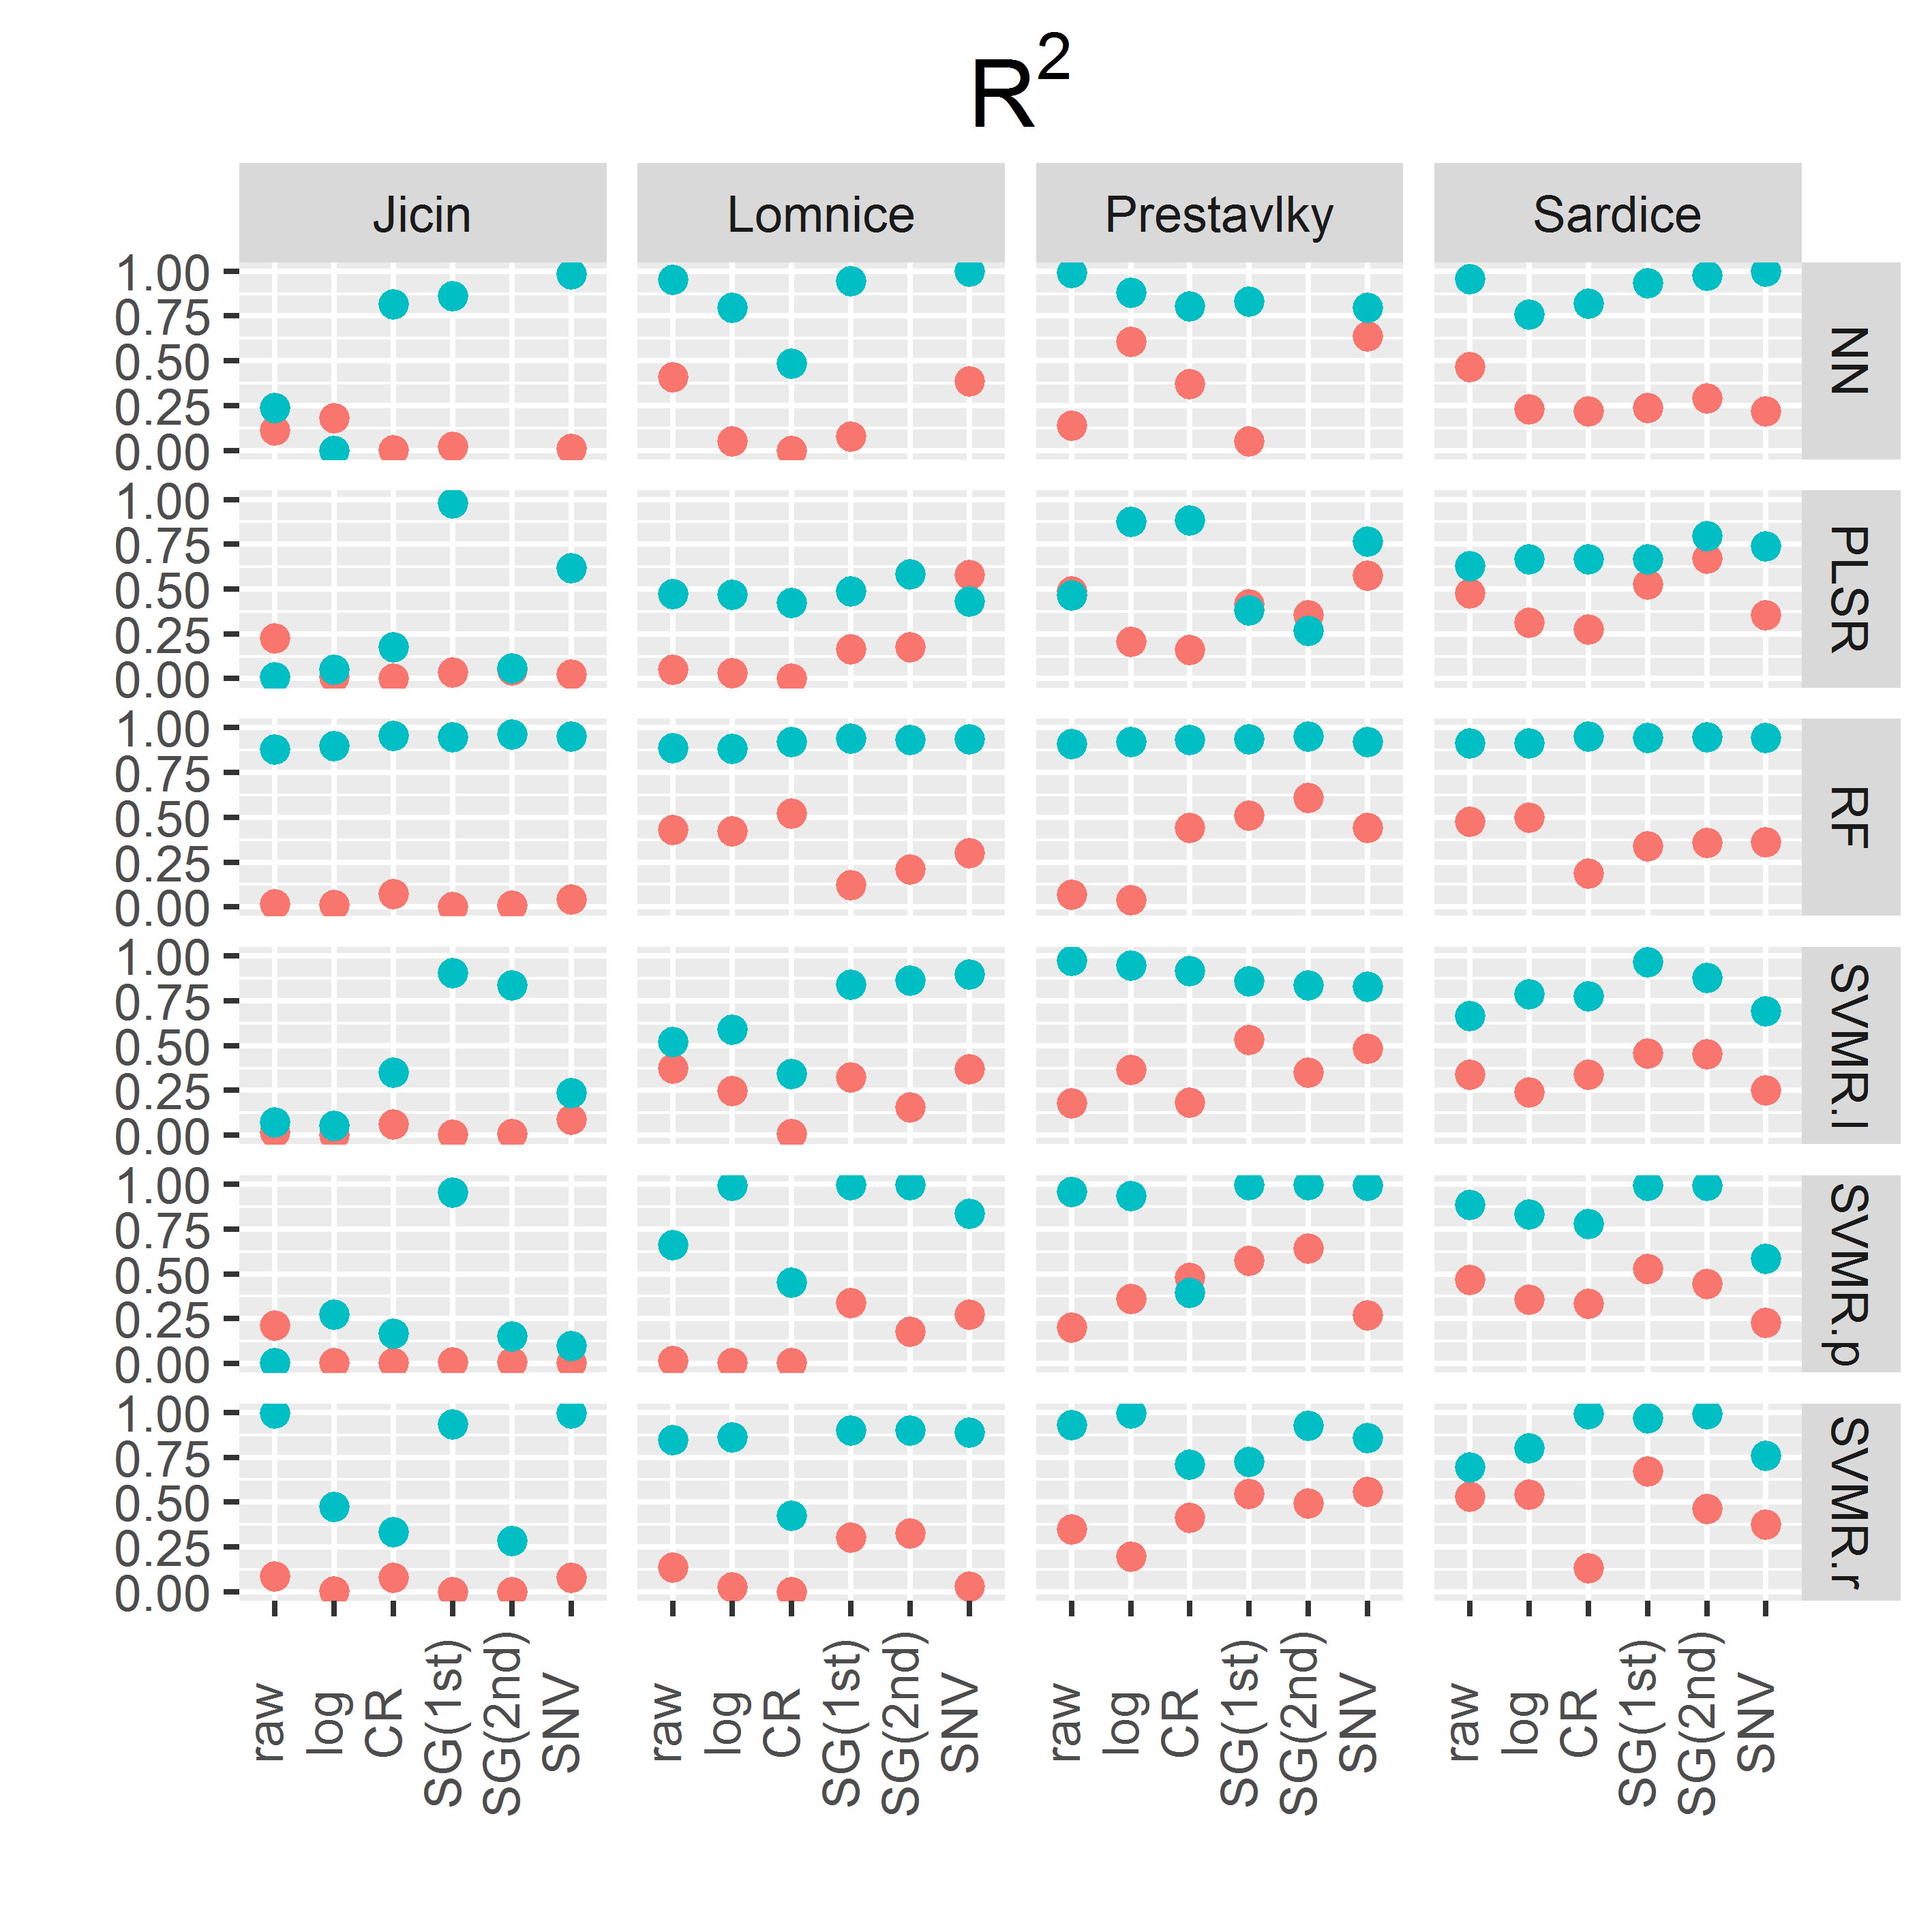 | 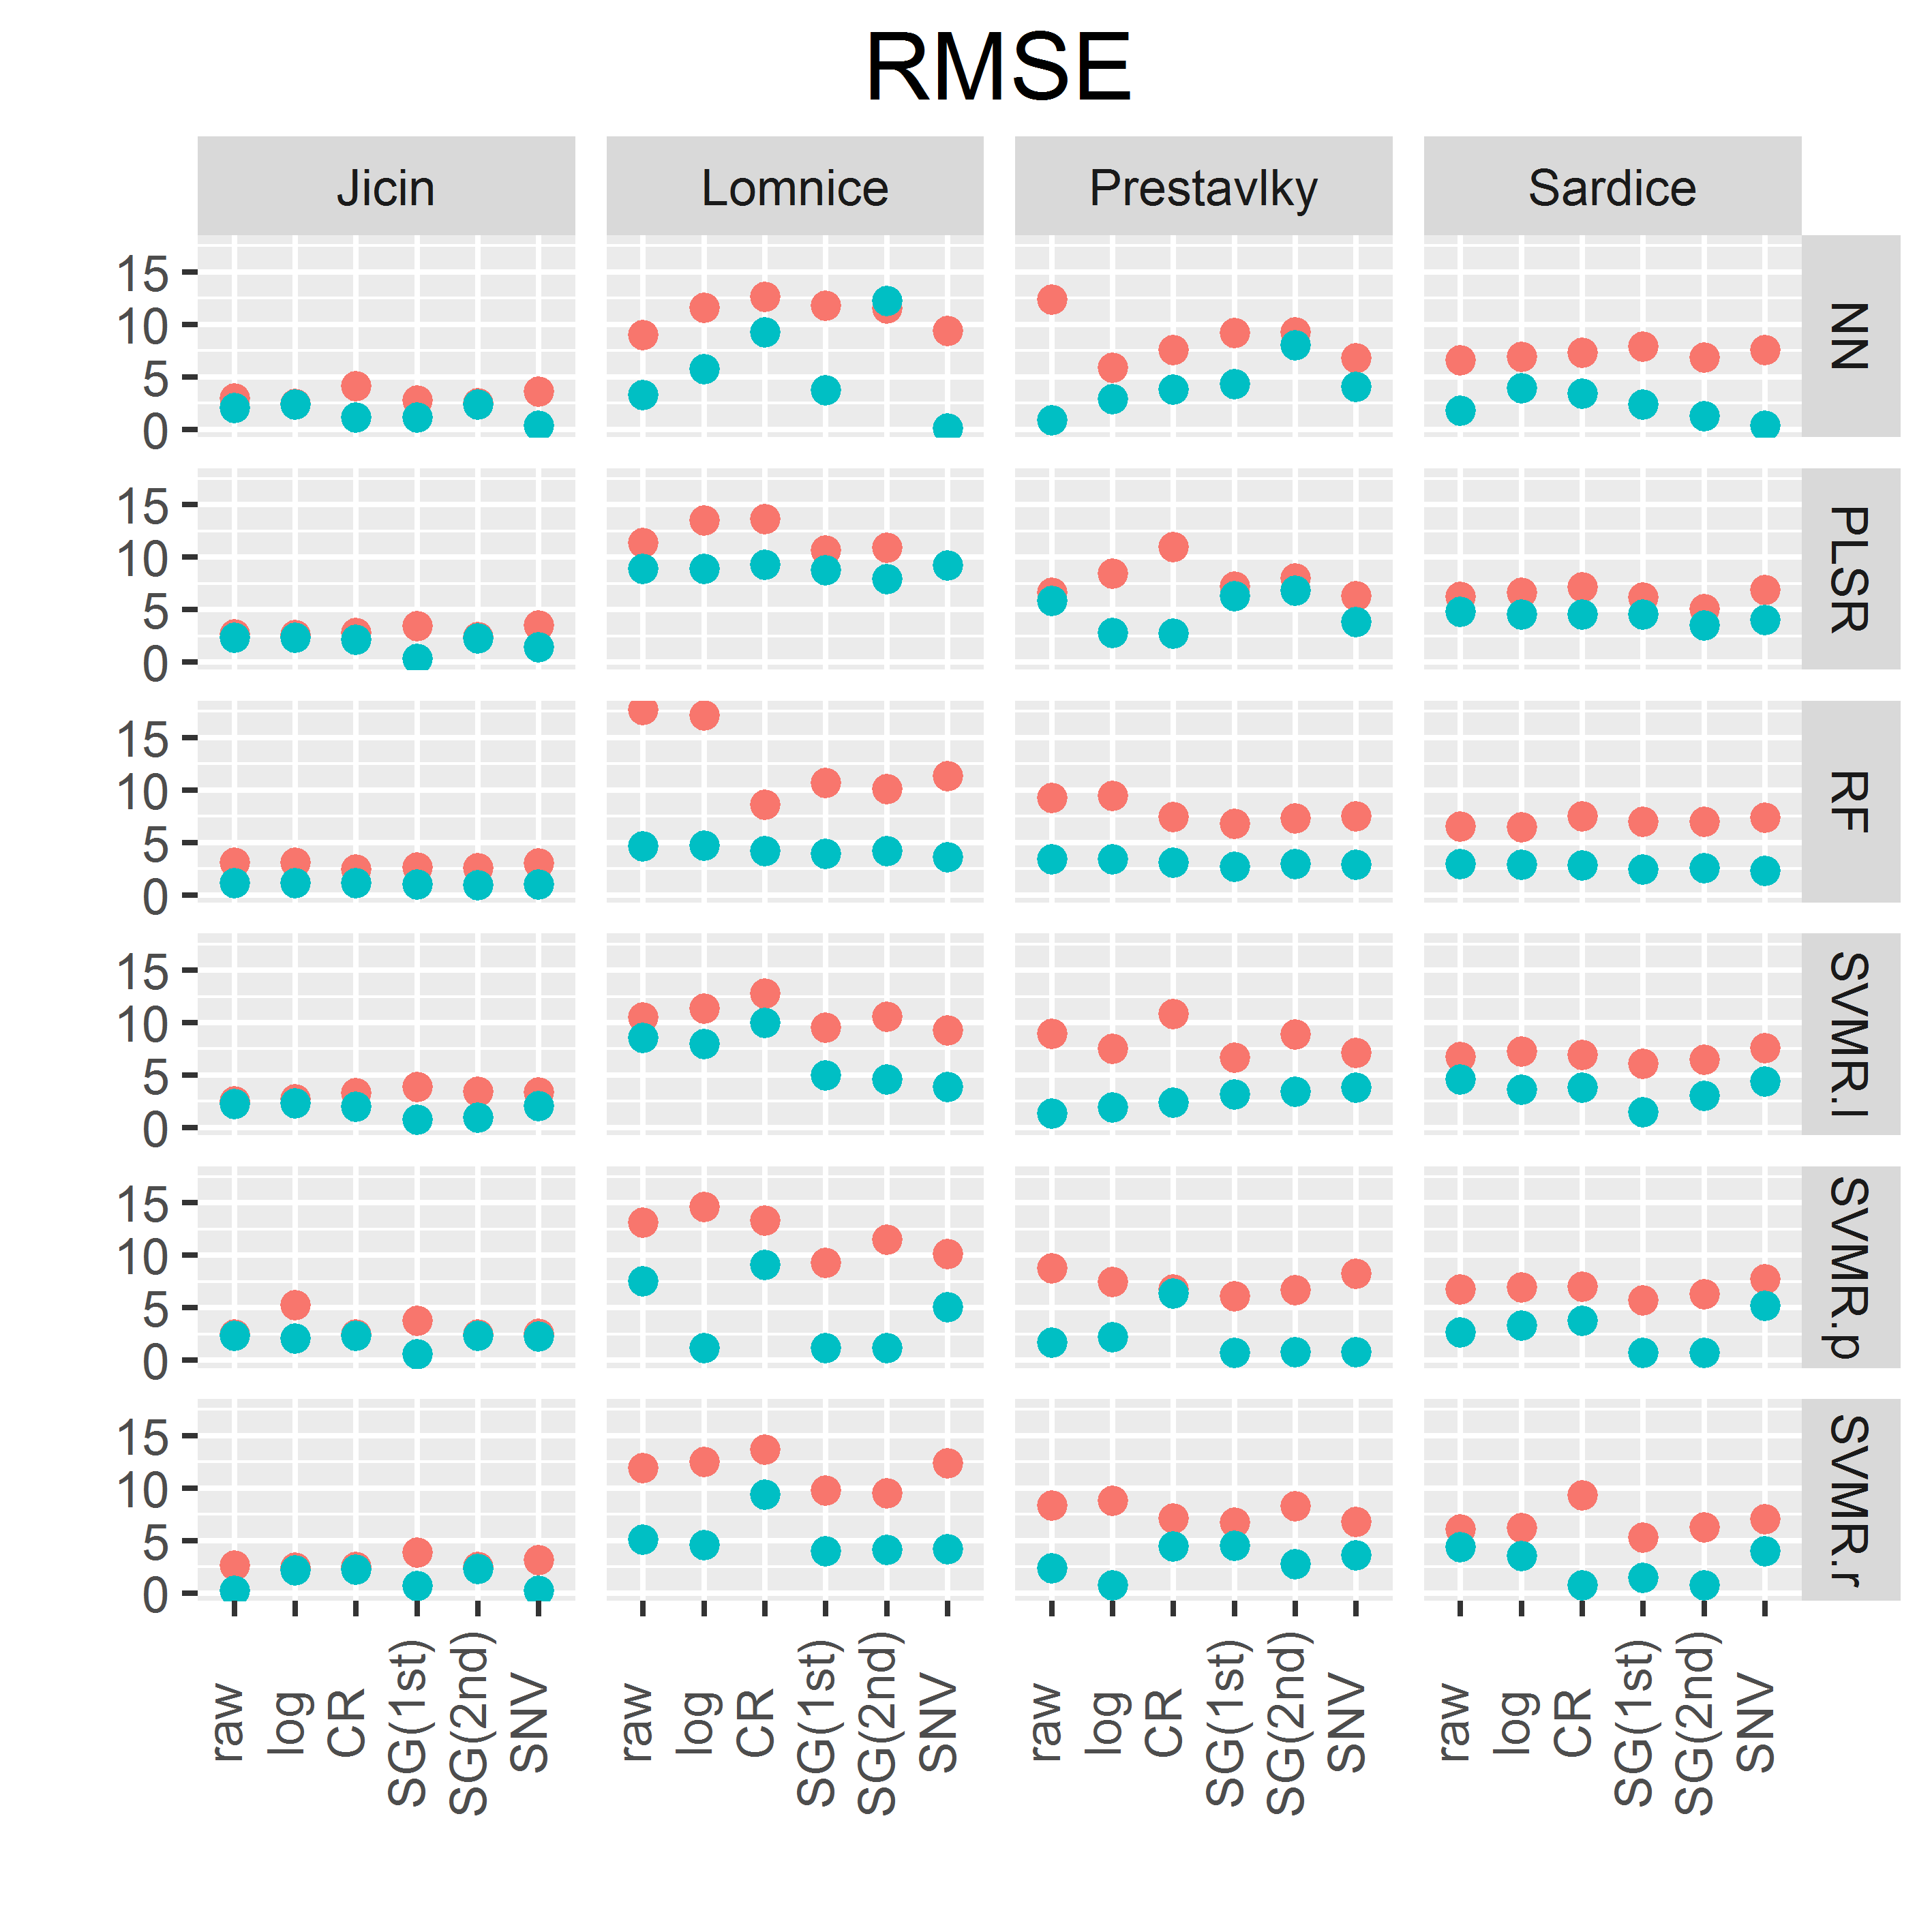 |
| (**f1**) | (**f2**) |
| 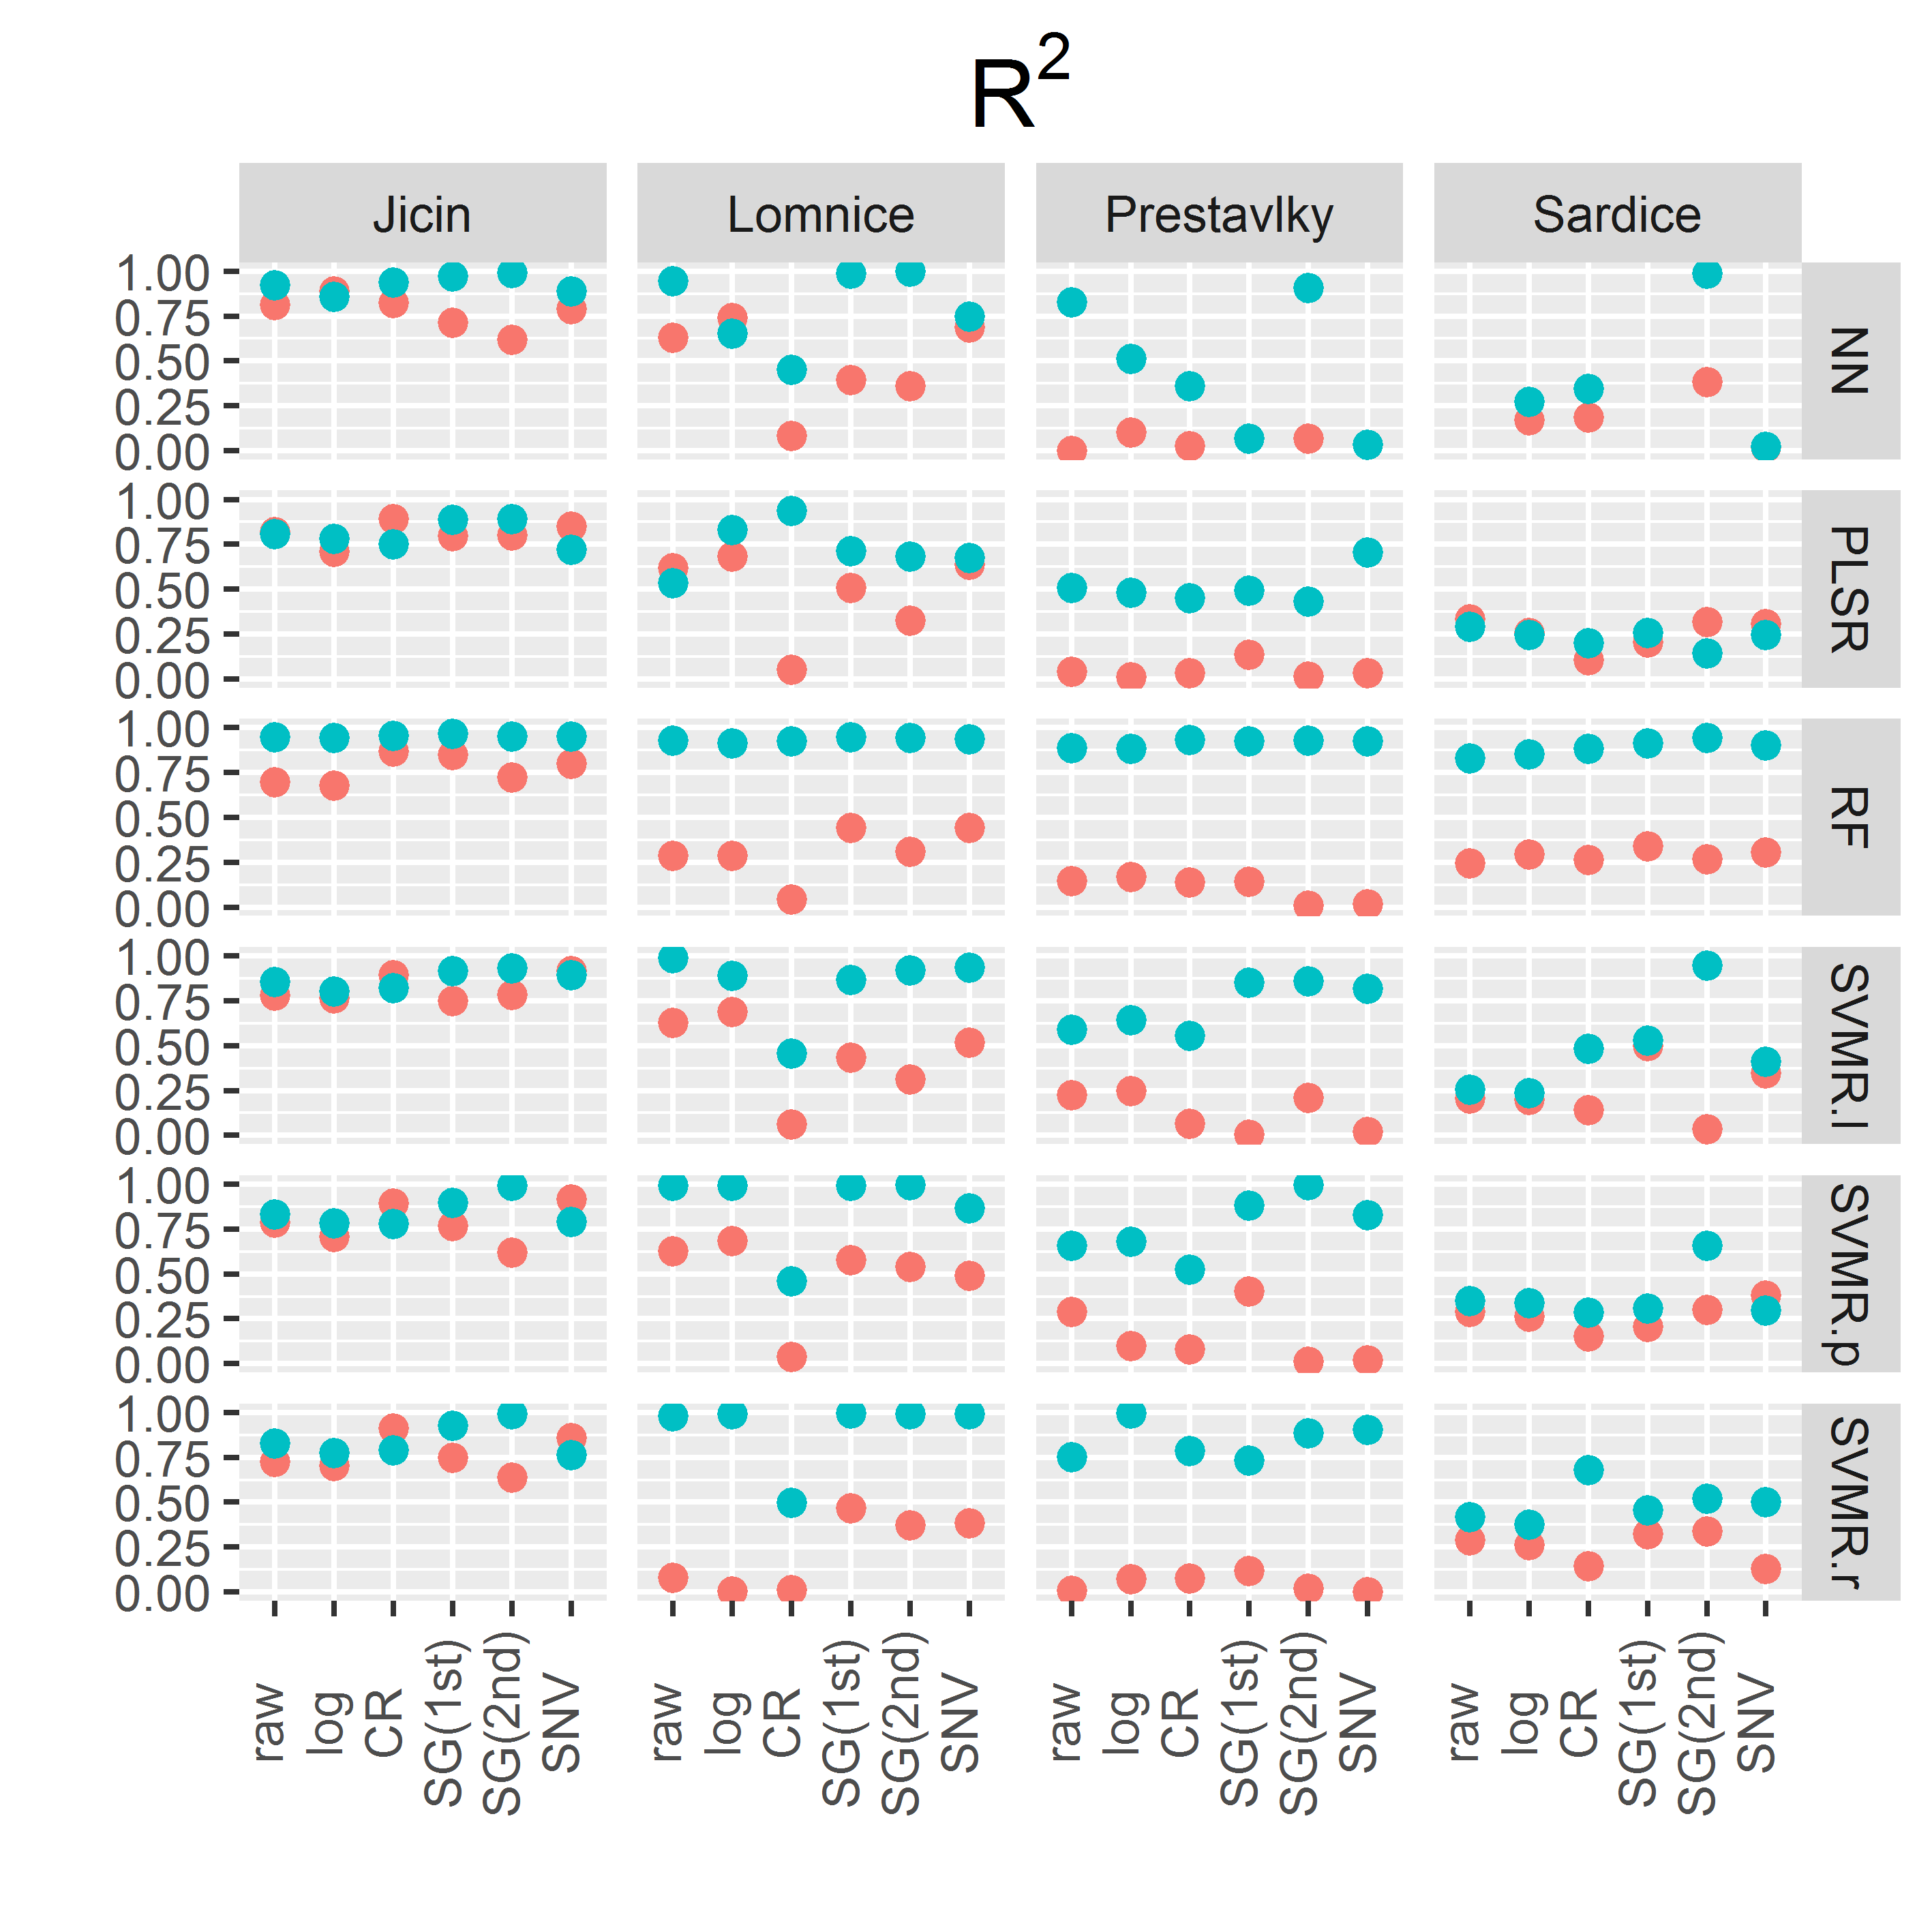 | 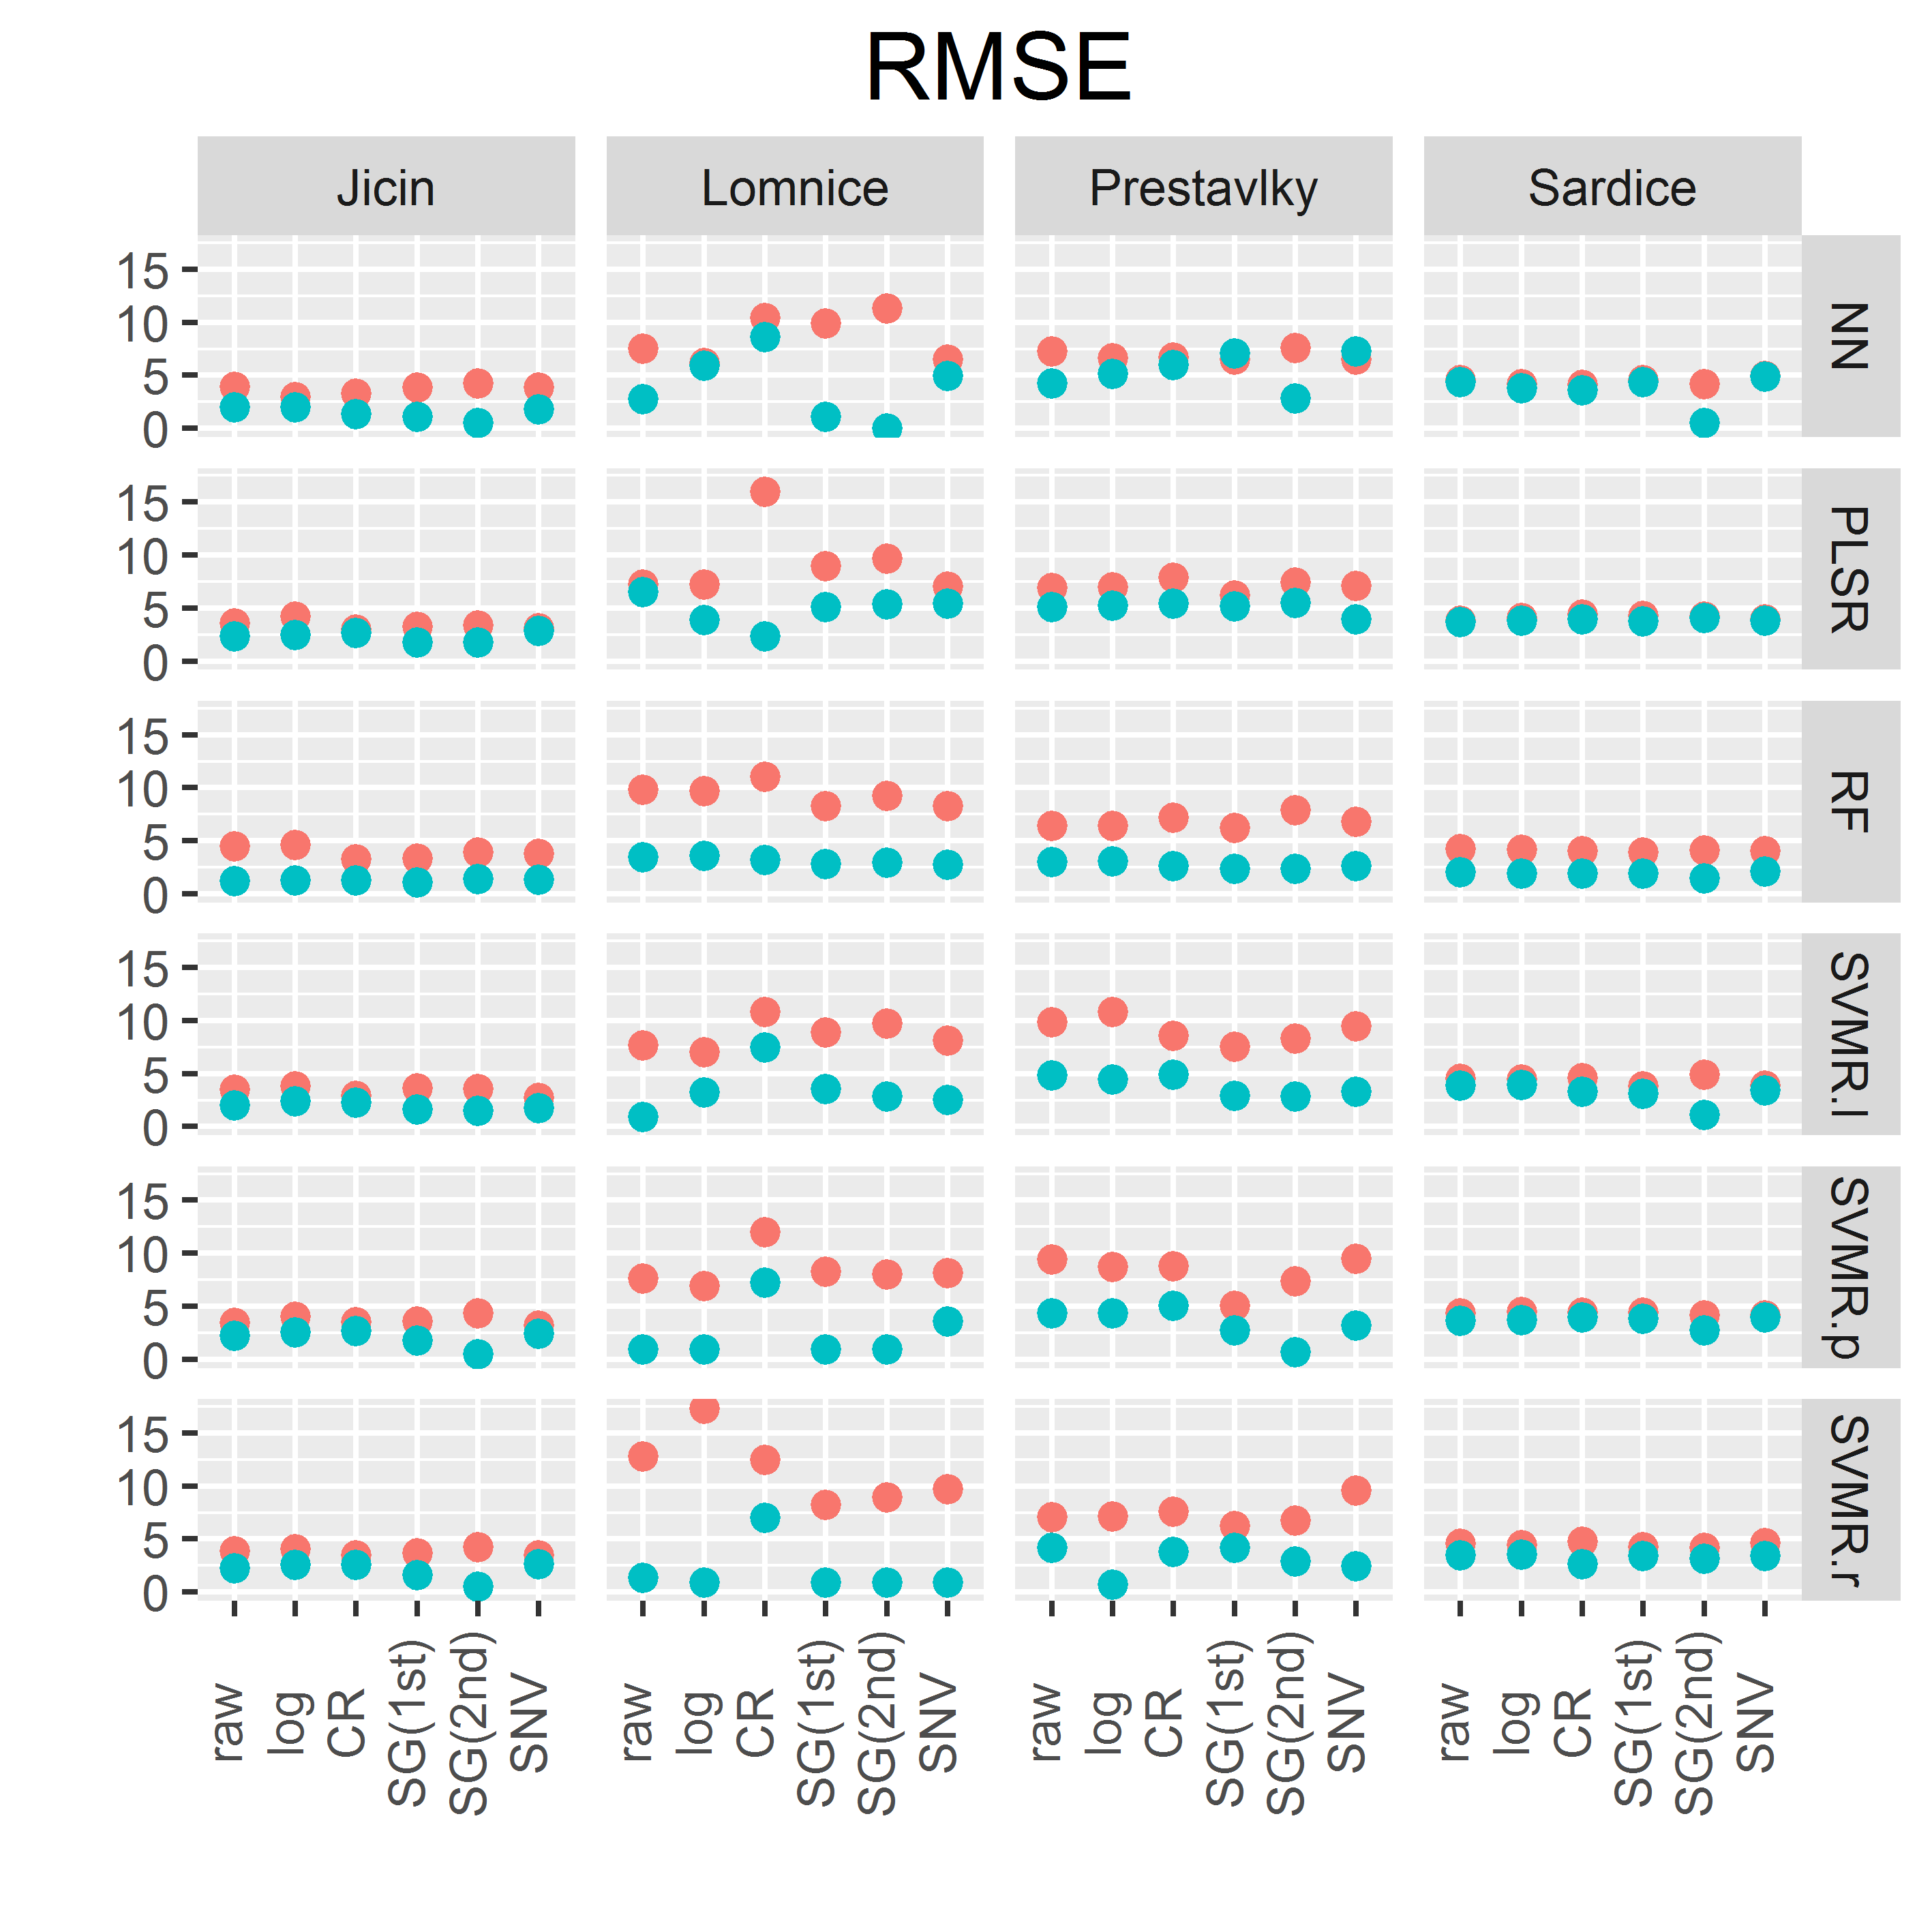 |
| (**g1**) | (**g2**) |

**Figure S1.** Values of R2 and RMSE in training and validation sets for all models and different types of pre-treatment. (**a1**) CaCO3_R2, (**a2**) CaCO3_RMSE; (**b1**) Clay_R2, (**b2**) Clay_RMSE; (**c1**) Cox_R2, (**c2**) Cox_RMSE; (**d1**) Fed_R2; (**d2**) Fed_RMSE; (**e1**) Feox_R2, (**e2**) Feox_RMSE; (**f1**) Sand_R2, (**f2**) Sand_RMSE; (**g1**) Silt_R2, (**g2**)Silt_RMSE.

© 2017 by the authors; licensee MDPI, Basel, Switzerland. This article is an open access article distributed under the terms and conditions of the Creative Commons by Attribution (CC-BY) license (http://creativecommons.org/licenses/by/4.0/).
